# CGRP Administration into the Cerebellum Evokes Migraine-like Behaviors Predominately in Female Mice

1 Mengya Wang<sup>1</sup>, Thomas L. Duong<sup>2</sup>, Brandon J. Rea<sup>2,3</sup>, Jayme S. Waite<sup>2</sup>, Michael W. Huebner<sup>2</sup>,  
2 Harold C. Flinn<sup>2</sup>, Andrew F. Russo<sup>2,3,4</sup>, Levi P. Sowers<sup>2,3</sup>

3 <sup>1</sup>Department of Neuroscience and Pharmacology, University of Iowa, Iowa City, Iowa, USA

4 <sup>2</sup>Department of Molecular Physiology and Biophysics, University of Iowa, Iowa City, Iowa, USA

5 <sup>3</sup>Center for the Prevention and Treatment of Visual Loss, Veterans Administration Health Center,  
6 Iowa City, Iowa, USA

7 <sup>4</sup>Department of Neurology, University of Iowa, Iowa City, Iowa, USA

8 \* **Correspondence:**

9 Corresponding author

10 levi-sowers@uiowa.edu

11 **Keywords: migraine, CGRP, cerebellum, light aversion, anxiety, pain**

## 12 **Abstract**

13 The neuropeptide calcitonin gene-related peptide (CGRP) is a major player in migraine  
14 pathophysiology. Previous preclinical studies demonstrated that intracerebroventricular  
15 administration of CGRP caused migraine-like behaviors in mice, but the sites of action in the brain  
16 remain unidentified. The cerebellum has the most CGRP binding sites in the central nervous system  
17 and is increasingly recognized as both a sensory and motor integration center. The objective of this  
18 study was to test whether the cerebellum, particularly the medial cerebellar nuclei (MN), might be a  
19 site of CGRP action. In this study, CGRP was directly injected into the right MN of C57BL/6J mice  
20 via a cannula. A battery of behavioral tests was done to assess migraine-like behaviors. CGRP caused  
21 light aversion measured as decreased time in the light zone even with dim light. The mice also spent  
22 more time resting in the dark zone, but not the light, along with decreased rearing and transitions  
23 between zones. These behaviors were similar for both sexes. In contrast, significant responses to  
24 CGRP were seen only with female mice in the open field assay, von Frey test, and automated squint  
25 assay, indicating anxiety, tactile hypersensitivity, and spontaneous pain, respectively. In male mice,  
26 the responses had the same trend as females but did not reach statistical significance. No detectable  
27 effect of CGRP on gait was observed in either sex. These results suggest that CGRP in the MN  
28 causes light aversion in males, while in females, light aversion is accompanied by increased anxiety,  
29 tactile hypersensitivity, and spontaneous pain. A caveat is that we cannot exclude contributions from  
30 other cerebellar regions in addition to the MN due to diffusion of the injected peptide. These results  
31 reveal the cerebellum as a new site of CGRP actions that may contribute to migraine  
32 pathophysiology and possibly its prevalence in females.

## 33 **1 Introduction**

34 Migraine is a neurological disease that affects about 15% of the population (1) and is the second  
35 leading cause of disability globally (2). It is characterized by moderate or severe headaches that are

36 accompanied by sensory abnormalities, such as photophobia and allodynia (3). Prevalence in women  
37 is about twice as high as in men (1). Despite its high prevalence and large burden to society, the  
38 mechanism underlying migraine have yet to be fully elucidated. Over the last few decades, calcitonin  
39 gene-related peptide (CGRP) has moved to the forefront in migraine pathophysiology. CGRP levels  
40 are elevated in both the ictal and interictal phases in human studies (4-6) and infusion of CGRP  
41 induced migraine-like headaches in ~66% of migraine patients (7-10). Most recently, CGRP-based  
42 drugs have been shown to effectively alleviate migraine symptoms in about 50% of patients (11, 12).  
43 However, despite the significant advancement of CGRP-based drugs as migraine therapeutics, there  
44 is uncertainty regarding the mechanisms by which CGRP induces migraine, especially as to where  
45 CGRP is acting.

46 The human studies measuring CGRP levels (4-6) and induction of migraine-like headaches by  
47 intravenous CGRP injections (7-10) suggest a peripheral site of action for CGRP in migraine. In  
48 addition, the antibodies targeted against CGRP or CGRP receptors have limited ability to cross the  
49 blood-brain barrier (13). However, previous animal studies demonstrated that peripheral  
50 (intraperitoneal, i.p.) (14) and central (intracerebroventricular, i.c.v.) (15) injection of CGRP induced  
51 similar light-aversive behaviors in wild-type mice. Both behaviors could be attenuated by triptan  
52 migraine drugs (14, 15). Moreover, transgenic mice overexpressing a CGRP receptor subunit in the  
53 nervous system displayed light aversion in response to dim light after i.c.v. CGRP injection (14, 16,  
54 17), while bright light was required to induce light aversion in wild-type mice after i.c.v. CGRP  
55 injection (15). Those data suggest that increased sensitivity to CGRP in the nervous system can cause  
56 migraine-like light-aversive behavior in mice. Finally, it was found that CGRP injection into the  
57 posterior thalamic nuclei, an integration center for light and pain signals, was sufficient to induce  
58 light aversion in wild-type C57BL/6J mice, even in dim light (18). Together, these data suggest that  
59 CGRP can work in the central nervous system to induce migraine-like photophobic behavior in mice.

60 Similar to the thalamus, the cerebellum integrates multiple sensory signals and motor events (19, 20).  
61 While the cerebellum was originally recognized for its role in motor control (21), there is mounting  
62 evidence that it also plays important roles in perceptual (22), emotional (23), and cognitive functions  
63 (24-26). In particular, it is now appreciated that the cerebellum participates in sensory, emotional,  
64 cognitive aspects of pain, and motor control in response to pain (27). Three lines of evidence support  
65 the link between the cerebellum and migraine pathogenesis. First, changes in cerebellar activation  
66 (28-30), structure (31-35) (36-38) (39-43), and functional connectivity (44-49) are present in  
67 episodic, chronic, and familial hemiplegic migraine patients. When responding to trigeminal stimuli,  
68 cerebellar activity and functional connectivity with the thalamus and cortical areas were changed  
69 (34), suggesting the cerebellum is involved in processing sensory information from the trigeminal  
70 system. Strikingly, migraine patients exhibited decreased cerebellar activation in response to  
71 trigeminal nociceptive stimuli after treatment with erenumab, a CGRP receptor antibody (50).  
72 Second, migraine patients display cerebellar symptoms, e.g., dizziness, vertigo (51), body sway (52,  
73 53), as well as increased body sway accompanied by increased light intensity (54). Third, the  
74 cerebellum communicates directly to migraine-related regions, such as the spinal trigeminal nucleus  
75 (55-57) and the thalamus (58) via direct neural circuits. These data hint to the importance of the  
76 cerebellum in migraine pathophysiology.

77 Curiously, the cerebellum has the highest binding density to CGRP receptor PET ligands in human  
78 and rhesus brains (59, 60). The canonical CGRP receptor subunits, receptor activity-modifying  
79 protein 1 (RAMP1) and calcitonin receptor-like receptor (CLR), are localized in the human, rhesus  
80 and rat cerebellar cortex (61-66) and in the medial cerebellar nuclei (MN, also known as fastigial

81 nuclei in humans) of rats (65). CGRP is also distributed in the cerebellar cortex (61, 62, 65-67) and  
82 the MN (65). In addition, as one of the three deep cerebellar nuclei, the MN receives sensory  
83 information via vestibular nuclei (68) and projects to migraine-related brain regions including the  
84 thalamus (69). The MN can also be activated by noxious thermal stimuli (27). Moreover, injection of  
85 an excitatory amino acid into the MN decreased pain-related responses to visceral stimuli (70, 71).  
86 The same amino acid stimulation increased dorsal column nuclei activity in response to non-noxious  
87 somatic stimuli (72). These findings suggest that the MN, specifically CGRP receptors in the MN,  
88 may be associated with migraine pathophysiology. Thus, we hypothesized that CGRP injection into  
89 the MN might induce migraine-like behaviors in mice.

90 To address the role of cerebellar CGRP in migraine-like behaviors, we injected CGRP into the  
91 cerebellum centered on the MN and performed a battery of migraine-related behavioral tests. The  
92 results demonstrated that CGRP infusion into the MN induced light aversion in both sexes, while  
93 anxiety, tactile hypersensitivity, and squinting behaviors were predominately in female mice.

## 94 **2 Materials and Methods**

### 95 **2.1 Animals**

96 Wild-type C57BL/6J mice were obtained from Jackson Labs (Bar Harbor, ME and Sacramento, CA)  
97 at 8-12 weeks of age and were housed in groups of 2-5 per cage before surgery. A total of 55  
98 C57BL/6J mice (28 females; 27 males) were used for this study. Female mice had an average starting  
99 body weight of 18-22 g and males were 20-25 g. Mice with cannulas were housed individually unless  
100 otherwise indicated to prevent mice from losing cannulas. All animals were housed on a 12-hour  
101 light cycle with access to water and food *ad libitum*. Animal procedures were approved by the Iowa  
102 City Veterans Administration and University of Iowa Animal Care and Use Committees and  
103 performed in accordance with the standards set by the National Institutes of Health.

### 104 **2.2 Surgery**

105 Cannulas were hand constructed from stainless steel hypodermic tubing (New England Small Tube  
106 Corporation; Supplementary Fig. 1). An 8-mm guide cannula was made from a 23-gauge needle (BD  
107 PrecisionGlide™) with the ventral portion covered by a ~7-mm, 19-gauge tubing (Supplementary  
108 Fig. 1A). The ~7-mm, 19-gauge tubing is ~2 mm higher than the 23-gauge needle to shield the  
109 junction between the guide's top and the dummy or injection cannula after their insertion  
110 (Supplementary Fig. 1A). The dummy cannula, used to seal and keep the guide cannula free of clogs,  
111 was made by crimping a short segment of ~5-mm, 23-gauge tubing to a ~14 mm piece of 30-gauge  
112 tubing (Supplementary Fig. 1B). The bottom of the 30-gauge tubing was cut to ensure that the 30-  
113 gauge segment below the ~5-mm, 23-gauge segment is 9 mm. The injection cannula was made by  
114 adhering a short segment of ~5-mm, 23-gauge tubing ~5 mm below the top of a ~20-mm piece of 30-  
115 gauge tubing with adhesive (Pacer Technology) and dental cement (Stoelting) (Supplementary Fig.  
116 1C). The bottom of the 30-gauge tubing was cut to ensure that the 30-gauge segment below the ~5-  
117 mm, 23-gauge segment is 10 mm. In this manner, the dummy cannula extended 1 mm beyond the  
118 end of the guide cannula tip when it was inserted into the guide cannula, while the injection cannula  
119 protruded 2 mm from the base of the guide cannula (Supplementary Fig. 1D).

120 Stereotaxic implantation of a guide cannula into the MN of the right cerebellum was performed under  
121 isoflurane anesthesia (induction 5%, maintenance 1.5%–2%). The coordinates for the right MN are:  
122 anterior/posterior (AP), -6.5 mm posterior to bregma; medial/lateral (ML), -0.85 mm lateral to the

123 midline; and dorsal/ventral (DV), -2.7 mm ventral to the pial surface according to the Allen Brain  
124 Reference Atlas. Guide cannulas were implanted 2 mm above the MN (AP: -6.5 mm; ML: -0.8 mm;  
125 DV: -0.7 mm). The implants were secured with bone anchor screws (Stoelting), adhesive, and dental  
126 cement. Dummy cannulas were inserted into guide cannulas when no injection was conducted. After  
127 surgery, mice were housed individually to reduce the loss of the guide or dummy cannulas. Mice  
128 were given ~10 days to recover from the surgery before testing unless otherwise indicated.

## 129 2.3 Drug administration

130 Rat  $\alpha$ -CGRP (Sigma-Aldrich) was diluted in 1X phosphate-buffered saline (PBS; HyClone<sup>TM</sup>). Mice  
131 were given either rat  $\alpha$ -CGRP (1  $\mu$ g, 5  $\mu$ g/ $\mu$ l) or 1X PBS (200 nl) as the vehicle through injection  
132 cannulas under anesthetized status (isoflurane: induction 5%, maintenance 1.5%–2%) unless  
133 otherwise indicated (details in Section 2.4.3 Von Frey test). Specifically, the dummy cannula was  
134 removed, and an injection cannula (2 mm extension from the base of the guide cannula) was inserted  
135 into the guide cannula. The injection cannula was connected to a 10  $\mu$ l syringe (Hamilton) and an  
136 injection pump (Cole-Parmer Instrument Co.) via polyethylene tubing (BD Intramedic<sup>TM</sup>, PE10). The  
137 injection rate was 100 nl/min for 2 min. After completing an infusion, the injection cannula was left  
138 in position for an additional 5-7 min before being withdrawn. Next, mice were returned to their home  
139 cages (individual housing) to recover for 60 min before testing unless otherwise indicated (details in  
140 Section 2.4.3 Von Frey test). The 60-min recovering period was chosen to minimize anesthesia  
141 effects (14, 15).

## 142 2.4 Behavioral tests

### 143 2.4.1 Light/dark assay

144 The testing chamber was a transparent, seamless open field chamber divided into two zones of equal  
145 size by a black infrared-transparent dark insert (Med Associates). The mouse activity was collected  
146 with infrared beam tracking and Activity Monitor software (Med Associates), as previously  
147 described (14-16, 18, 73-76). Mice were tested without pre-exposure to the chamber using dim light  
148 (55 lux) after PBS or CGRP administration as described above. One hour post-injection, mice were  
149 placed in the light zone of the light/dark chamber and data were collected for 30 min and analyzed in  
150 sequential 5 min intervals.

151 Motility outcomes were collected during the light/dark assay, as described previously (14-16, 18, 73-  
152 76). Briefly, resting time was measured as the percentage of time animals did not break any new  
153 beams in each zone over the time spent in the same zone. Vertical beam breaks, an assessment of  
154 rearing behavior, was determined as the number of mice breaking the beam at 7.3-cm height in each  
155 zone, which was then normalized to the time spent in the same zone.

### 156 2.4.2 Open field assay

157 This assay is to measure locomotion and anxiety-like behavior. The apparatus was the same as in the  
158 light/dark assay with the absence of the dark insert, as described previously (14, 18, 76). Mice were  
159 placed in the middle of the open field chamber with the light intensity at 55 lux one hour after PBS or  
160 CGRP infusion. The periphery was defined as 3.97 cm from the border with the reminding area of  
161 19.05 x 19.05 cm as the center. The time in the center was calculated as the percentage of time spent  
162 in the center over the total time in the chamber.

### 163 2.4.3 Von Frey test

164 The test is to evaluate the mechanical nociceptive threshold. For baseline experiments, mice were  
165 habituated to the room for one hour before acclimating to an acrylic chamber (10.80 x 6.99 x 14.61  
166 cm in W x D x H) for one hour. The acrylic chamber was placed over a grid support (Bioseb,  
167 France). On the treatment day, investigators gently restrained the mouse and replaced the dummy  
168 cannula with an injection cannula. Then CGRP or PBS was infused via injection cannulas to the MN  
169 of the conscious and free-moving mice. Anesthesia (isoflurane) was not used since it induced a  
170 noticeable increase in the right hind paw withdrawal sensitivity in our pilot test. The reason is  
171 unclear, but one study reported that different doses of isoflurane had opposite effects on pain  
172 withdrawal sensitivity in response to thermal stimuli (77). Considering that the isoflurane effect  
173 might mask the CGRP effect, we decided to inject mice without anesthesia in the von Frey test. After  
174 injection, mice were allowed to rest in their home cages for 30 min and then placed in the acrylic  
175 chamber for another 30 min before applying von Frey filaments to their hind paws. Right and left  
176 hind paws were tested at the same time after treatment.

177 The investigator who applied filaments was blinded to the treatments and used the up-and-down  
178 method as previously described (78-80). Briefly, filaments were applied for 5 seconds to the skin of  
179 the mouse plantar surface, with D (0.07 g) as the starting filament. A withdrawal response was  
180 considered when mice withdrew, shook, or licked the tested hind paws. The withdrawal threshold at  
181 which 50% of mice withdrew their hind paws was determined based on an established equation (79,  
182 80). However, the threshold data produced in this method are not continuous and cannot be analyzed  
183 using parametric statistics. Thus, in order to obtain normal distribution, the 50% thresholds (g) were  
184 transformed into log format for data analysis and figure plotting.

### 185 2.4.4 Automated squint assay

186 This assay is to evaluate spontaneous pain by measuring the right-eye pixel areas recorded by a  
187 camera. Mice were acclimated to a customized collar restraint to reduce stress induced by restraint as  
188 well as struggle or head movement as described previously (81). C57BL/6J mice underwent  
189 acclimation for 20 min per session for three sessions. On the test day, after habituation to the room  
190 for one hour, the mouse was placed in the restraint, and squint was recorded for 5 min under room  
191 light as the baseline. Then CGRP or PBS was infused into the MN via an injection cannula. The  
192 mouse was returned to the home cage to rest for one hour, followed by another restraint and squint  
193 recording for 5 min under room light as the treatment recording. Pixel area measurement for the right  
194 eye palpebral fissure was derived every 0.1 seconds (10 frames per second) in the recordings using  
195 trained facial detection software (FaceX, LLC, Iowa City, IA) with the resulting values compiled  
196 with a custom MATLAB script. Individual frames containing a tracking error rate of >15% were  
197 excluded.

### 198 2.4.5 Gait dynamic assay

199 Gait dynamics were measured using the DigiGait imaging system (Mouse Specifics Inc, Boston, MA,  
200 USA). The system consists of a transparent chamber (17.14 x 5.08 x 15.24 cm in W x D x H), a  
201 transparent plastic treadmill belt, an under-mounted digital camera, a light over the chamber for  
202 camera capturing videos (~7200 lux), software to record videos (DigiGait Imager), and an image  
203 analysis software (DigiGait Analysis).



204 Mice were habituated to the room for one hour prior to any running. Mice first were placed in the  
205 chamber of the DigiGait apparatus for 1 min to allow them to explore the chamber. The belt was then  
206 turned on and mice were run at 16 cm/s, an optimal speed predetermined in C57BL/6J mice. Images  
207 of the paws were ventrally captured during the run. Each mouse ran until roughly 3-5 seconds of  
208 continuous gait was observed, a range sufficient to acquire adequate quantification of gait  
209 parameters. Mice underwent recordings before PBS or CGRP injection as the baseline. After  
210 injection, mice recovered in the home cages for one hour prior to another recording. A minimum of a  
211 one-hour interval was allotted between baseline and treatment trials to allow mice to recover from the  
212 previous running.

213 The mouse paw prints were analyzed by DigiGait Analysis to identify stride length and frequency. A  
214 complete stride was defined as the portion of foot strike to subsequent foot strike on the treadmill belt  
215 of the same foot.

## 216 2.5 Histology

217 After finishing all the behavioral tests, the injection sites were identified by the injection cannula tip,  
218 or by infusing Evans blue dye (200 nl, 1% dye, diluted in 1X PBS), or red retrograde beads (200 nl,  
219 Red Retrobeads<sup>TM</sup>, LumaFluor, Inc.) to confirm targeting accuracy. Fluorescein-15-CGRP (1 µg; 200  
220 nl mixed in 1X PBS) was injected into 4 mice to determine how far CGRP could spread from the  
221 MN. One hour post-injection, mice were deeply anesthetized with ketamine/xylazine (87.5  
222 mg/kg/12.5 mg/kg, i.p.) and were perfused transcardially with 1X PBS and subsequently with 4%  
223 paraformaldehyde. Brains were removed and post-fixed in 4% paraformaldehyde at 4 °C overnight,  
224 followed by soaking in 10, 20, 30% sucrose per 24 hours in order. Brains were embedded in a tissue-  
225 freezing medium and stored at -80 °C until use. 100 µm coronal slices were collected from mouse  
226 brains injected with Evans blue. 40 µm coronal slices were collected from brains injected with red  
227 beads or fluorescein-15-CGRP. Slices from brains injected with fluorescein-15-CGRP were  
228 counterstained by incubation with TO-PRO-3 iodide. Slices were mounted onto Superfrost Plus  
229 slides (Fisher Scientific) using antifade mountant (VECTASHIELD). Images were captured using a  
230 scanning microscope (Olympus, VS120). Imaging of brains injected with Evans blue or red beads  
231 was performed using a light microscope (Olympus, CKX41) equipped with an Infinity 1 camera and  
232 processed using the INFINITY ANALYZE software (Lumenera Corporation).

## 233 2.6 Experimental design

234 To reduce the number of animals used in this study, the cannula system was used to allow the same  
235 mouse to undergo different assays. The first cohort was tested in the light/dark assay, open field  
236 assay, von Frey test, and automated squint assay. Because of the COVID-19 pandemic, the second  
237 cohort which had been exposed to the light/dark assay, open field assay and von Frey test were  
238 euthanized to minimize the burden in the animal facility. To repeat experiments in the automated  
239 squint assay, a third cohort was included. Unlike the previous two cohorts, the third cohort was first  
240 housed in groups after surgery. However, due to the high rate of dummy cannula loss in group  
241 housing conditions for about one week, mice were then housed individually instead, consistent with  
242 earlier cohorts. Von Frey test, gait dynamic and automated squint assays were performed in this  
243 cohort. Data from all cohorts were pooled for the final analysis.

244 The order of light/dark assay and open field assay was switched in the two cohorts to avoid an order  
245 bias. All the mice received the same treatment in the light/dark and open field assays to ensure the  
246 consistency. The same treatment in the light/dark assay was also given in the squint and gait dynamic

247 assays. One cohort received crossover treatment in the automated squint assay. To ensure the  
248 withdrawal threshold in the von Frey test was comparable in control and experimental groups, mice  
249 were divided into two groups using a randomization protocol based on the baseline threshold. Mice  
250 were allowed to recover in their home cages for at least one day between each behavioral test. The  
251 light/dark or open field assays were performed first, followed by the von Frey test and the gait  
252 dynamic assay. The automated squint assay was performed last. All behavioral experiments were  
253 performed between 7:00 A.M. and 6:00 P.M., and mice were habituated to the room for one hour  
254 before experiments.

## 255 2.7 Statistical analysis

256 A power analysis was performed prior to experiments for sample size estimation based on previous  
257 studies from the lab and a post-hoc power analysis was performed to estimate the number of  
258 additional male mice needed to reach significance using ClinCalc.com. In the power analysis, an  
259 alpha of 0.05 and a power of 0.80 was used. The analysis determined that 10 mice in each group were  
260 needed. Data were analyzed using GraphPad Prism 9 and are reported in Supplementary Table 1.  
261 Significance was set at  $P < 0.05$ . Error bars represent  $\pm$  SEM. A two-way repeated measure ANOVA  
262 was performed when data were plotted as a function of time (factor: treatment and time) or for the  
263 scatter plot graphs of the von Frey and squint experiments (factor: treatment and condition). For all  
264 graphs, when the interaction or the condition was significant, Šídák's multiple comparisons test was  
265 used as the post hoc analysis. For the data from the light/dark and open field assays, an unpaired t-  
266 test was performed for bar graphs with scatter points to compare the effect of each treatment.

267 A total of 3 mice died during the surgical procedure and one mouse lost the guide cannula before  
268 running any behavioral test. Two mice from the light/dark assay and one mouse from the open field  
269 assay were excluded due to chamber recording problems. In the von Frey test, 4 total mice were  
270 excluded: 3 mice due to the blockage of injection cannulas and one mouse due to the loss of the  
271 guide cannula. In the gait dynamic assay, 2 mice were excluded due to a video recording problem. In  
272 the automated squint assay, 2 mice were excluded due to the loss of the guide cannulas, 3 mice due to  
273 the blockage of injection cannulas, and 5 mice due to the poor habituation in the restraint or poor eye  
274 recognition by the software. Mouse numbers used for each experiment are reported in the figure  
275 legends.

## 276 3 Results

### 277 3.1 Injection of CGRP into the MN induced light-aversive behavior and reduced motility 278 under dim light in both male and female mice

279 We injected CGRP into the MN of the right cerebellum via permanently placed cannulas and exposed  
280 the mice to the light/dark assay in dim light (55 lux) one hour post-injection. Light aversion was  
281 expressed as both a function of time over the 30-min testing period (Fig. 1A) and the average time in  
282 light for individual mice per 5 min interval (Fig. 1B). Regardless of sex, mice injected with CGRP  
283 spent less time in the light than those injected with PBS during the 30-min testing time (Fig. 1A,  
284 left). On average, the PBS-treated mice spent 141 seconds in the light per 5-min interval, and CGRP-  
285 treated mice spent 55 seconds (Fig.1B, left). When data were separated by sex, both male and female  
286 mice spent significantly less time in light after CGRP injection than those with PBS injection (Fig.  
287 1A and B, middle and right). For all mice, confirmation of the targeting site was performed. The  
288 injection sites for mice in all behavioral tests are shown in Fig. 1C. Among 21 mice that experienced  
289 the light/dark assay, injection sites for 6 mice were not in or near the MN, primarily in the cerebellar

290 cortex. However, these 6 off-target mice did not display significant differences in time in light from  
291 the on-target mice (data not shown). However, it should be noted that it is underpowered for off-  
292 target mice. Together, these data demonstrate that CGRP injection into the MN induces light-  
293 aversive behavior in both male and female mice.

294 Resting behavior was evaluated in the same light/dark assay. No difference was observed in the  
295 percent resting time in the light zone between CGRP- and PBS-injected mice (Fig. 2A and B, upper  
296 panel). In contrast, in the dark zone, CGRP-injected mice spent more time resting than PBS-injected  
297 mice across both sexes (Fig. 2A and B lower panel). In addition, CGRP-injected mice had  
298 significantly fewer rearings (vertical beams breaks) in both the light and dark zones across sexes  
299 (Fig. 2C and D). While there was a trend, the decreased rearing did not reach statistical significance  
300 in the male or female groups after CGRP injection, likely due to the variability and small sample size  
301 in each sex (Fig. 2C and D). Finally, transitions between dark and light zones were significantly  
302 decreased by CGRP for both sexes (Fig. 2E and F).

303  
304 Since the cerebellum is well-known for motor control and the MN controls axial and trunk muscles  
305 and maintains posture and balance (68), we tested the effect of CGRP delivery into the MN on gait.  
306 We conducted the gait dynamic assay using DigiGait system. Injection of PBS or CGRP into the MN  
307 did not change the stride length or frequency compared to their respective baselines across and within  
308 sexes (Supplementary Fig. 2). This indicates that CGRP administration into the MN decreases  
309 motility without gait alterations.

### 310 **3.2 Injection of CGRP into the MN induced anxiety-like behavior primarily in female mice in** 311 **the open field assay**

312 To assess anxiety behavior independent of light, we used the open field assay. Inclusion of this assay  
313 was necessary because spending less time in the light in the light/dark assay can be an indicator of an  
314 increased anxiety state (76), and not necessarily a specific aversion to light. It is important to note  
315 though that the two are not mutually exclusive since light aversion may include increased anxiety.

316 The mice injected with CGRP spent less time in the center than those injected with PBS during the  
317 30-min testing time (Fig. 3A and B, left). However, when data were analyzed by sex, females  
318 exhibited significantly less time in the center over the entire testing time (Fig. 3A and B, middle),  
319 while there was only a trend in males observed in the last 10 min (Fig. 3A and B, right). These data  
320 suggest that CGRP delivery into the MN elicited general anxiety-like behavior primarily in female  
321 mice, which may have contributed to their light-aversive behavior.

### 322 **3.3 Injection of CGRP into the MN induced plantar tactile hypersensitivity in the** 323 **contralateral hind paw primarily in female mice**

324 Cutaneous allodynia is present in approximately 60% of migraine patients with a higher prevalence  
325 in women than men (82, 83). Thus, we investigated the effect of CGRP administration into the right  
326 MN on tactile hypersensitivity as a generally accepted indicator of allodynia by measuring the tactile  
327 sensitivity in the plantar area of the right and left hind paws.

328 In the contralateral left hind paw, there was a significant decrease in the withdrawal threshold  
329 observed for all the CGRP-treated mice (Fig. 4A, left). However, the difference is primarily driven  
330 by effects in the female mice, who showed a significant decrease in the withdrawal threshold after



331 CGRP but not PBS injection compared to their respective baselines (Fig. 4A, middle). The CGRP-  
332 induced decrease in the threshold was only a trend in male mice (Fig. 4A, right).

333 In contrast, the ipsilateral right paw results were more complicated due to a significant decrease in  
334 withdrawal threshold compared to baselines in response to not only CGRP, but also PBS vehicle  
335 (Fig. 4B, left). When separated by sex, there was a trend for female mice after PBS treatment and a  
336 significant decrease after CGRP treatment compared to respective baselines (Fig. 4B, middle). A  
337 significant decrease was observed for male mice after either PBS or CGRP treatment (Fig. 4B, right)  
338 compared to baselines. The decrease in males after CGRP treatment is similar to the vehicle effect  
339 observed with PBS injection, suggesting that disturbance to the right MN is enough to increase  
340 ipsilateral hind paw sensitivity. For the von Frey test, 7 of the 43 mice had injection sites not in or  
341 near the MN. When comparing data between on-target mice and off-target mice, no difference was  
342 observed between these two groups, but it should be noted that the off-target mice were  
343 underpowered. Altogether, these data suggest that CGRP increases the contralateral left hind paw  
344 touch sensitivity predominantly in female mice, while injection of either PBS vehicle or CGRP  
345 increases sensitivity in the ipsilateral right hind paw.

### 346 **3.4 Injection of CGRP into the MN induced squinting behavior primarily in female mice**

347 The grimace scale was developed to evaluate spontaneous pain expression in mice (84). Our  
348 laboratory found that orbital tightening, or squint, is the principal component of mouse grimace score  
349 (85) and has developed an automated video-based squint assay to measure spontaneous pain (81).  
350 Taking advantage of this sensitive automated squint platform, we asked whether mice squint after  
351 CGRP injection in the MN.

352 For all mice, CGRP-treated mice showed a decrease in the mean pixel area over the 300-second  
353 testing period, while no change was observed in the PBS-treated mice compared to their respective  
354 baselines (Fig. 5A). When data were separated by sex, CGRP-treated females showed a significant  
355 decrease in the mean pixel area (Fig. 5B), while CGRP-treated males only showed a trend (Fig. 5C).  
356 No difference was observed in female or male PBS-treated groups (Fig. 5B and C, left and right).  
357 These data suggest that CGRP injection into the MN induces squint behavior predominantly in  
358 female mice.

### 359 **3.5 The diffusion range of CGRP from the injection sites**

360 To obtain an estimate of the likely diffusion of CGRP after injection into the MN, we used a  
361 fluorescent CGRP analog. Fluorescein-15-CGRP is a full CGRP receptor agonist but has less potency  
362 than CGRP as measured by cAMP production in HEK293T cells (86). Representative images of the  
363 rostral and caudal borders of fluorescein-15-CGRP diffusion from the MN are shown in  
364 Supplementary Fig. 3A upper and lower panels, respectively. There was considerable diffusion of  
365 fluorescein-15-CGRP from the injection site, with punctate signals found in cell bodies in the MN  
366 that may represent binding sites (Supplementary Fig. 3A, middle panel, box 1). In addition to the  
367 MN, fluorescein-15-CGRP was also observed in nearby regions, including the interposed and lateral  
368 cerebellar nuclei, granular, Purkinje cell, and molecular layers of vermal lobules I/III/IV/V  
369 (Supplementary Fig. 3A, middle panel, box 2). There was some variability in the spread of  
370 fluorescence among the mice injected with fluorescein-15-CGRP, with the smallest spread covering  
371 the MN and few nearby cells in the vermal lobules III/IV/V (Supplementary Fig. 3B, purple shading)  
372 and the largest spread covering the MN and cells beyond the MN including vermal lobules  
373 I/III/IV/V/X, the simple lobule and other cerebellar deep nuclei (Supplementary Fig. 3B, blue

374 shading). The reason for variability in diffusion is not known but is apparently not due to injection  
375 site variability based on the injection sites shown by injection of red beads or Evans blue  
376 (Supplementary Fig. 3C and D).

## 377 **4 Discussion**

378 To our knowledge, this is the first preclinical cerebellar migraine study looking at behavioral  
379 outcomes. Indeed, there have been few animal studies looking at imaging and electrophysiological  
380 links between the cerebellum and migraine (87-92). Brain imaging studies have reported that the  
381 cerebellar sodium concentration and functional connectivity to the insula or anterior cingulate cortex  
382 were altered in animal migraine models induced by nitroglycerin or inflammatory soup (87-89). The  
383 firing rate of Purkinje cells in the rat paraflocculus was decreased in an animal model induced by  
384 trigeminal stimulation (90), and the organization of parallel fibers to Purkinje cell synapses was  
385 abnormal in familial hemiplegic migraine type 1 mouse models (91, 92). There are also preclinical  
386 behavioral studies investigating the role of the cerebellum in pain modulation (70-72, 93-99). Our  
387 finding that several migraine-like symptoms can be induced by CGRP actions in the cerebellum  
388 supports the hypothesis that the cerebellum contributes to migraine pathogenesis.

### 389 **4.1 The MN and light aversion**

390 Photophobia is a subjective experience in which normal light causes discomfort (100-102). In this  
391 study, we found that administration of CGRP into the MN induced light aversion in male and female  
392 mice. In addition, CGRP evoked anxiety-like behavior in females, but only a trend in males. Thus,  
393 we conclude that the light aversion induced in males is not solely driven by anxiety, while in females  
394 the light aversion may be influenced by an overall increased anxiety level. Anxiety symptoms have  
395 been reported to be positively correlated to light aversion in migraine patients with the possibility  
396 that anxiety contributes to light aversion (103). In male mice, there appears to be a biphasic response  
397 where an anxiety-like response may have occurred during the final 10 min of the assay. While not  
398 significant, it suggests that the light aversion detected in males may be partially driven by increased  
399 anxiety at later time points.

400 An unexpected finding was that both male and female mice were aversive to even dim light after  
401 CGRP injection, analogous to migraine patients who report light hypersensitivity in dim light that  
402 does not bother control subjects. We had previously reported that transgenic mice overexpressing the  
403 CGRP receptor in the nervous system were sensitive to dim light (~55 lux) after i.c.v. CGRP  
404 injection (14, 16, 17), while light aversion induced in wild-type C57BL/6J mice required bright light  
405 (~27,000 lux, similar to a sunny day) (15). Those data suggested that hypersensitivity to CGRP in the  
406 nervous system leads to light hypersensitivity. Interestingly, in contrast to i.c.v. injections, CGRP  
407 injected directly into the posterior thalamic nuclei (18) and cerebellar MN in this study, caused light  
408 aversion with dim light in C57BL/6J mice. These data indicate that like the posterior thalamus, the  
409 MN is sensitive to CGRP signaling without a need to increase receptor expression, perhaps due to  
410 increased local concentrations of CGRP relative to i.c.v. deliveries.

411 One model to explain the clinical manifestation of photophobia is convergence of signals from  
412 intrinsically photosensitive retinal ganglion cells onto posterior thalamic neurons that also receive  
413 nociceptive signals from the trigeminal nucleus (104). Light and nociceptive signals are then  
414 integrated and sent to the somatosensory and visual cortices (104). In support of this model, we have  
415 recently reported that injection of CGRP into the posterior thalamic region or optogenetic stimulation  
416 of that same region caused light aversion (18). How might the cerebellum fit into this model? One

417 possibility may be via bilateral fibers from the principle sensory trigeminal nucleus and spinal  
418 trigeminal nucleus to the posterior vermis of the cerebellum (57), which projects to the MN (68). The  
419 MN is known to project to various thalamic nuclei including parafascicular, centrolateral,  
420 mediodorsal, ventrolateral, suprageniculate, and posterior nuclei (69). Thus, the MN may lie in a  
421 circuit from the trigeminal system to the thalamus. However, unlike the thalamus, there are no  
422 apparent direct retinocerebellar connections (105, 106). These data place the MN in a prime position  
423 to assist in sensory integration and play a modulatory role in the nociceptive- and light- integrating  
424 function of the thalamus.

## 425 **4.2 The MN and anxiety**

426 It is striking to observe the apparent sexually dimorphic anxiety-like behaviors predominantly in  
427 female mice after CGRP injection into the MN. These data are consistent with the higher prevalence  
428 of anxiety disorders in women than men (107). The MN sends direct projections to the limbic system  
429 including the amygdala (68), which is key to the anxiety circuitry (108), and projects to the  
430 periaqueductal gray (PAG) (69, 109), which is critical for aversive and anxiety-like responses (110).  
431 The observations of light-aversive behavior accompanied by increased anxiety levels in females are  
432 reminiscent of the behavior induced by optical stimulation of the dorsal PAG (18). This evidence  
433 might explain the anxiogenic effect of the MN. The possible mechanism for the sex difference in  
434 anxiety (or the other behaviors, including plantar tactile hypersensitivity and squinting discussed in  
435 Section 4.3) is not known. It is interesting to point out that sex differences appeared in human fMRI  
436 studies when migraine patients were exposed to a noxious stimulus (111). In that study, female  
437 migraine patients showed higher activation in the cerebellum and higher deactivation of cerebellar  
438 functional connectivity with insula than males in response to noxious heat. Finally, it is possible that  
439 there could be sexually dimorphic differences in the distribution pattern of CGRP receptor  
440 components in the MN or in downstream brain regions.

## 441 **4.3 The MN and evoked and spontaneous pain**

442 Allodynia is the perception of pain induced by non-noxious stimuli. Nearly 60% of individuals with  
443 migraine have cutaneous allodynia, specifically thermal and mechanical allodynia (82). Cutaneous  
444 allodynia is associated with migraine frequency, severity, and disability, and is more common in  
445 females (82, 83). Moreover, cutaneous allodynia is more frequent in chronic migraine than episodic  
446 migraine (112) and is believed to be a predictor of migraine chronification (113). Allodynia in  
447 migraine is found in cephalic and extracephalic regions, which could be explained by the  
448 sensitization of the second-order trigeminal and third-order thalamic neurons (114).

449 In this study, we found that CGRP injection into the MN increases sensitivity in response to  
450 mechanical stimuli in contralateral hind paws predominately in female mice, which is consistent with  
451 the clinical finding that cutaneous allodynia is higher in women than in men (82, 83) and a preclinical  
452 study where intraplantar CGRP at a low dose evoked hind paw allodynia only in female rats (115).  
453 Given that we also observed anxiety behavior primarily in female mice, it is interesting that allodynia  
454 is associated with a higher risk for anxiety and a correlation exists between their severity in migraine  
455 patients (116). Anxiety was more prevalent in patients with migraine and probable migraine with  
456 cutaneous allodynia than those without cutaneous allodynia (117). In animal models, stress elicited  
457 higher pain sensitivity (118). These data suggest an association between anxiety and allodynia, so it  
458 is possible that anxiety induced by CGRP injection in female mice is linked to the tactile  
459 hypersensitivity indicative of allodynia.

460 How might the cerebellum increase paw sensitivity? There is evidence the cerebellum can affect the  
461 descending pain modulation pathway (93, 98, 99, 119), including via connections to the reticular  
462 formation (69, 93, 98). One study suggested that the MN could impact the dorsal column–medial  
463 lemniscus pathway directly or via the descending pain pathway (72). In addition, the MN projects to  
464 the thalamus bilaterally with contralateral preponderance (69), which might contribute to central  
465 sensitization and then lead to a pain hypersensitive state. However, the specific neuronal type in the  
466 MN that expresses CGRP receptors and specific regions that are modulated by CGRP in the MN are  
467 unknown.

468 An unexplained observation is that the ipsilateral hind paw showed a significant decrease in  
469 sensitivity after both PBS and CGRP injection into the MN. No change was observed after inserting  
470 the injection cannulas into the MN, without any injections, suggesting that the response was due to  
471 the solution. Because of the vehicle effect, a conclusion cannot be drawn from the ipsilateral paw  
472 data.

473 Our studies showed that CGRP injection into the MN induced squinting behavior predominately in  
474 females, suggesting CGRP in the MN plays a role in spontaneous pain. This is consistent with dural  
475 application of CGRP also causing grimace only in female mice (115). The magnitude of the squint  
476 response is relatively small in females (12.9%) compared to intraplantar injection of formalin  
477 (25.3%), and is closer to the response seen with wild-type female C57BL/6J mice receiving a small  
478 i.p. CGRP dose (0.01 mg/kg) (17.1%) (81).

#### 479 **4.4 The MN and motor function**

480 We observed increased resting time in the dark while no change in the light in the light/dark assay  
481 across and within sex, corresponding to the preference of migraine patients to go to the dark and rest.  
482 Vertical beam breaks and transitions were decreased, suggesting exploratory behavior was decreased.  
483 The MN is responsible for controlling axial and trunk muscles, posture and balance (68). However,  
484 we did not observe gait difference before or after PBS or CGRP treatment using the DigiGait system.  
485 A recent study reported that an increase in light intensity could enhance postural sway in migraine  
486 patients compared to controls (54), so perhaps additional triggers may be needed to detect such  
487 effects in mouse models. Overall, these data suggest that CGRP injection into the MN does not  
488 induce gait changes.

#### 489 **4.5 Caveats**

490 A caveat of this study is the broad diffusion area of CGRP. We used fluorescein-15-CGRP for  
491 diffusion estimation. Extensive spread was observed from the MN with the injection of fluorescein-  
492 15-CGRP, which was not completely unexpected. The diffusion was similar (approximately 800-  
493 4000  $\mu\text{m}$  rostral to caudal) as when fluorescein-15-CGRP was injected into the posterior thalamic  
494 region and was estimated to spread at least 1400  $\mu\text{m}$  in some cases (18). This is consistent with the  
495 volume transmission reported for some peptides diffusing up to millimeters in the brain (120). The  
496 robust spread of CGRP explains why even the off-target injections had similar behaviors as the on-  
497 target injections. While the diffusion is extensive, it apparently did not reach the fourth ventricle,  
498 which is near the MN, since no fluorescein-15-CGRP was detected in the fourth ventricle.  
499 Furthermore, the behavior is not likely due to CGRP diffusing into the cerebrospinal fluid since, as  
500 mentioned earlier, i.c.v. CGRP did not induce light aversion in wild-type C57BL/6J mice under dim  
501 light (15), while injection into the MN did. Nonetheless, the broad diffusion of fluorescein-15-CGRP  
502 beyond the MN decreases the targeting specificity, which makes it difficult to pinpoint which



503 regions, in the MN or near the MN, are important for the responses induced by CGRP. Future studies  
504 will need to focus on limiting the spread of CGRP beyond the MN.

505 A related caveat is that location of CGRP receptor subunits RAMP1 and CLR in the mouse  
506 cerebellum has not been studied. Importantly, clusters of fluorescein-15-CGRP observed within the  
507 MN are consistent with a prior report of MN CGRP receptors in the rat (65). Such clusters were also  
508 found in the molecular, Purkinje cell and granular layers in the vermal lobules and simple lobule in  
509 the hemisphere regions. Previous studies have reported RAMP1 and CLR co-expression in Purkinje  
510 cells in the rat, human and rhesus cerebellum (61, 66). However, consistent data is lacking for  
511 RAMP1 or/and CLR expression in the molecular layer or granular layer in the rat cerebellum (61, 65)  
512 and no reports for mice, to our knowledge. In addition, the possible expression of the second CGRP  
513 receptor (AMY1) (121) in the mouse cerebellum has not been explored.

514 We observed several responses to cerebellar CGRP that were only statistically significant in female  
515 mice. However, we want to couch that observation with the prediction that if more mice were  
516 analyzed, then the trends seen with male mice could also reach significance for the open field, von  
517 Frey, and grimace assays. Because the study was designed to be sufficiently powered (see section  
518 2.7), we did not try to further increase the number of male mice. However, to estimate how many  
519 more mice might be required to reach significance, we did a post-hoc power analysis for each of the  
520 assays. About twice the number of male mice is predicted to be needed to reach statistical  
521 significance comparable to the females. Hence, as seen with human migraine populations, we are  
522 seeing a quantitative bias for female responses and not an absolute female-only mechanism.

## 523 **4.6 Conclusions**

524 In conclusion, this study reveals that CGRP injection into the cerebellum is sufficient to induce  
525 migraine-like behaviors primarily in female mice. This discovery provides a new perspective on the  
526 increasingly complex neural circuitry of migraine pathophysiology and suggests a role for central  
527 CGRP signaling in the sexual dimorphic nature of migraine.

## 528 **5 Conflict of Interest**

529 A.F.R. is a consultant for Lundbeck, Amgen, Novartis, Eli Lilly, AbbVie, and Schedule 1  
530 Therapeutics. The authors declare no other competing financial interests.

## 531 **6 Author Contributions**

532 Author contributions: M.W., L.P.S., and A.F.R. designed research; M.W., T.L.D., B.J.R., J.S.W.,  
533 M.W.H., H.C.F. performed research; M.W., L.P.S., T.L.D. analyzed data; M.W., L.P.S., T.L.D.,  
534 A.F.R. interpreted data; M.W., L.P.S., A.F.R. wrote the paper.

## 535 **7 Funding**

536 This work was supported by grants from the NIH R01 NS075599 and RF1 NS113839, VA-ORD  
537 (RR&D) MERIT 1 I01 RX003523-0, Career Development Award (IK2 RX002010), and Center for  
538 Prevention and Treatment of Visual Loss (VA C6810-C). The contents do not represent the views of  
539 Veterans Administration or the United States Government.

## 540 **8 Acknowledgments**



541 We thank Krystal Parker, Jonah Heskje and Hunter Halverson for the help on the cannula system,  
542 Debbie Hay and Christopher Walker for providing fluorescein-15-CGRP, and the VA Center for the  
543 Prevention and Treatment of Visual Loss for use of facilities.

## 544 9 References

- 545 1. Collaborators GBDH. Global, regional, and national burden of migraine and tension-type  
546 headache, 1990-2016: a systematic analysis for the Global Burden of Disease Study 2016. *Lancet*  
547 *Neurol* (2018) 17(11):954-76. Epub 2018/10/26. doi: 10.1016/S1474-4422(18)30322-3. PubMed  
548 PMID: 30353868; PubMed Central PMCID: PMC6191530.
- 549 2. Disease GBD, Injury I, Prevalence C. Global, regional, and national incidence, prevalence,  
550 and years lived with disability for 354 diseases and injuries for 195 countries and territories, 1990-  
551 2017: a systematic analysis for the Global Burden of Disease Study 2017. *Lancet* (2018)  
552 392(10159):1789-858. Epub 2018/11/30. doi: 10.1016/S0140-6736(18)32279-7. PubMed PMID:  
553 30496104; PubMed Central PMCID: PMC6227754.
- 554 3. Headache Classification Committee of the International Headache Society (IHS) The  
555 International Classification of Headache Disorders, 3rd edition. *Cephalalgia* (2018) 38(1):1-211.  
556 Epub 2018/01/26. doi: 10.1177/0333102417738202. PubMed PMID: 29368949.
- 557 4. Goadsby PJ, Edvinsson L, Ekman R. Vasoactive peptide release in the extracerebral  
558 circulation of humans during migraine headache. *Ann Neurol* (1990) 28(2):183-7. Epub 1990/08/01.  
559 doi: 10.1002/ana.410280213. PubMed PMID: 1699472.
- 560 5. Ashina M, Bendtsen L, Jensen R, Schifter S, Olesen J. Evidence for increased plasma levels  
561 of calcitonin gene-related peptide in migraine outside of attacks. *Pain* (2000) 86(1-2):133-8. Epub  
562 2000/04/26. doi: 10.1016/s0304-3959(00)00232-3. PubMed PMID: 10779670.
- 563 6. Cernuda-Morollon E, Larrosa D, Ramon C, Vega J, Martinez-Camblor P, Pascual J. Interictal  
564 increase of CGRP levels in peripheral blood as a biomarker for chronic migraine. *Neurology* (2013)  
565 81(14):1191-6. doi: DOI 10.1212/WNL.0b013e3182a6cb72. PubMed PMID:  
566 WOS:000330768200007.
- 567 7. Asghar MS, Hansen AE, Amin FM, van der Geest RJ, Koning P, Larsson HB, et al. Evidence  
568 for a vascular factor in migraine. *Ann Neurol* (2011) 69(4):635-45. Epub 2011/03/19. doi:  
569 10.1002/ana.22292. PubMed PMID: 21416486.
- 570 8. Guo S, Vollesen ALH, Olesen J, Ashina M. Premonitory and nonheadache symptoms induced  
571 by CGRP and PACAP38 in patients with migraine. *PAIN* (2016) 157(12):2773-81. doi:  
572 10.1097/j.pain.0000000000000702. PubMed PMID: 00006396-201612000-00018.
- 573 9. Hansen JM, Hauge AW, Olesen J, Ashina M. Calcitonin gene-related peptide triggers  
574 migraine-like attacks in patients with migraine with aura. *Cephalalgia* (2010) 30(10):1179-86. doi:  
575 10.1177/0333102410368444. PubMed PMID: WOS:000285052900005.
- 576 10. Lassen LH, Haderslev P, Jacobsen VB, Iversen HK, Sperling B, Olesen J. CGRP may play a  
577 causative role in migraine. *Cephalalgia* (2002) 22(1):54-61. doi: DOI 10.1046/j.1468-  
578 2982.2002.00310.x. PubMed PMID: WOS:000174216500009.
- 579 11. Edvinsson L, Haanes KA, Warfvinge K, Krause DN. CGRP as the target of new migraine  
580 therapies - successful translation from bench to clinic. *Nat Rev Neurol* (2018) 14(6):338-50. doi:  
581 10.1038/s41582-018-0003-1. PubMed PMID: WOS:000433426600010.

- 582 12. Rapoport AM, McAllister P. The Headache Pipeline: Excitement and Uncertainty. *Headache*  
583 (2020) 60(1):190-9. doi: 10.1111/head.13728. PubMed PMID: WOS:000506067400020.
- 584 13. Johnson KW, Morin SM, Wroblewski VJ, Johnson MP. Peripheral and central nervous  
585 system distribution of the CGRP neutralizing antibody [I-125] galcanezumab in male rats.  
586 *Cephalalgia* (2019) 39(10):1241-8. doi: 10.1177/0333102419844711. PubMed PMID:  
587 WOS:000482243200005.
- 588 14. Mason BN, Kaiser EA, Kuburas A, Loomis MM, Latham JA, Garcia-Martinez LF, et al.  
589 Induction of Migraine-Like Photophobic Behavior in Mice by Both Peripheral and Central CGRP  
590 Mechanisms. *J Neurosci* (2017) 37(1):204-16. Epub 2017/01/06. doi: 10.1523/JNEUROSCI.2967-  
591 16.2016. PubMed PMID: 28053042; PubMed Central PMCID: PMC5214631.
- 592 15. Kaiser EA, Kuburas A, Recober A, Russo AF. Modulation of CGRP-induced light aversion in  
593 wild-type mice by a 5-HT(1B/D) agonist. *J Neurosci* (2012) 32(44):15439-49. Epub 2012/11/02. doi:  
594 10.1523/JNEUROSCI.3265-12.2012. PubMed PMID: 23115181; PubMed Central PMCID:  
595 PMC3498941.
- 596 16. Recober A, Kaiser EA, Kuburas A, Russo AF. Induction of multiple photophobic behaviors  
597 in a transgenic mouse sensitized to CGRP. *Neuropharmacology* (2010) 58(1):156-65. Epub  
598 2009/07/18. doi: 10.1016/j.neuropharm.2009.07.009. PubMed PMID: 19607849; PubMed Central  
599 PMCID: PMC2784010.
- 600 17. Recober A, Kuburas A, Zhang Z, Wemmie JA, Anderson MG, Russo AF. Role of calcitonin  
601 gene-related peptide in light-aversive behavior: implications for migraine. *J Neurosci* (2009)  
602 29(27):8798-804. Epub 2009/07/10. doi: 10.1523/JNEUROSCI.1727-09.2009. PubMed PMID:  
603 19587287; PubMed Central PMCID: PMC2944225.
- 604 18. Sowers LP, Wang M, Rea BJ, Taugher RJ, Kuburas A, Kim Y, et al. Stimulation of Posterior  
605 Thalamic Nuclei Induces Photophobic Behavior in Mice. *Headache* (2020) 60(9):1961-81. Epub  
606 2020/08/05. doi: 10.1111/head.13917. PubMed PMID: 32750230; PubMed Central PMCID:  
607 PMC7604789.
- 608 19. Rondi-Reig L, Paradis A-L, Lefort JM, Babayan BM, Tobin C. How the cerebellum may  
609 monitor sensory information for spatial representation. *Front Syst Neurosci* (2014) 8:205-. doi:  
610 10.3389/fnsys.2014.00205. PubMed PMID: 25408638.
- 611 20. Wiestler T, McGonigle DJ, Diedrichsen J. Integration of sensory and motor representations of  
612 single fingers in the human cerebellum. *J Neurophysiol* (2011) 105(6):3042-53. Epub 2011/04/08.  
613 doi: 10.1152/jn.00106.2011. PubMed PMID: 21471398.
- 614 21. Manto M, Bower JM, Conforto AB, Delgado-Garcia JM, da Guarda SNF, Gerwig M, et al.  
615 Consensus Paper: Roles of the Cerebellum in Motor Control-The Diversity of Ideas on Cerebellar  
616 Involvement in Movement. *Cerebellum* (2012) 11(2):457-87. doi: 10.1007/s12311-011-0331-9.  
617 PubMed PMID: WOS:000304466100026.
- 618 22. Baumann O, Borra RJ, Bower JM, Cullen KE, Habas C, Ivry RB, et al. Consensus Paper: The  
619 Role of the Cerebellum in Perceptual Processes. *Cerebellum* (2015) 14(2):197-220. doi:  
620 10.1007/s12311-014-0627-7. PubMed PMID: WOS:000350897800014.
- 621 23. Adamaszek M, D'Agata F, Ferrucci R, Habas C, Keulen S, Kirkby KC, et al. Consensus  
622 Paper: Cerebellum and Emotion. *Cerebellum* (2017) 16(2):552-76. doi: 10.1007/s12311-016-0815-8.  
623 PubMed PMID: WOS:000396044200024.

- 624 24. Van Overwalle F, Manto M, Cattaneo Z, Clausi S, Ferrari C, Gabrieli JDE, et al. Consensus  
625 Paper: Cerebellum and Social Cognition. *Cerebellum* (2020) 19(6):833-68. doi: 10.1007/s12311-020-  
626 01155-1. PubMed PMID: WOS:000545937300001.
- 627 25. Koziol LF, Budding D, Andreasen N, D'Arrigo S, Bulgheroni S, Imamizu H, et al. Consensus  
628 Paper: The Cerebellum's Role in Movement and Cognition. *Cerebellum* (2014) 13(1):151-77. doi:  
629 10.1007/s12311-013-0511-x. PubMed PMID: WOS:000332156100016.
- 630 26. Parker KL, Narayanan NS, Andreasen NC. The therapeutic potential of the cerebellum in  
631 schizophrenia. *Front Syst Neurosci* (2014) 8:163. Epub 2014/10/14. doi: 10.3389/fnsys.2014.00163.  
632 PubMed PMID: 25309350; PubMed Central PMCID: PMC4163988.
- 633 27. Moulton EA, Schmahmann JD, Becerra L, Borsook D. The cerebellum and pain: passive  
634 integrator or active participator? *Brain Res Rev* (2010) 65(1):14-27. Epub 2010/06/18. doi:  
635 10.1016/j.brainresrev.2010.05.005. PubMed PMID: 20553761; PubMed Central PMCID:  
636 PMC2943015.
- 637 28. Farago P, Tuka B, Toth E, Szabo N, Kiraly A, Csete G, et al. Interictal brain activity differs in  
638 migraine with and without aura: resting state fMRI study. *J Headache Pain* (2017) 18. doi: ARTN 8  
639 10.1186/s10194-016-0716-8. PubMed PMID: WOS:000397741200001.
- 640 29. Wang JJ, Chen X, Sah SK, Zeng C, Li YM, Li N, et al. Amplitude of low-frequency  
641 fluctuation (ALFF) and fractional ALFF in migraine patients: a resting-state functional MRI study.  
642 *Clin Radiol* (2016) 71(6):558-64. doi: 10.1016/j.crad.2016.03.004. PubMed PMID:  
643 WOS:000376697000010.
- 644 30. Afridi SK, Giffin NJ, Kaube H, Friston KJ, Ward NS, Frackowiak RSJ, et al. A positron  
645 emission tomographic study in spontaneous migraine. *Arch Neurol-Chicago* (2005) 62(8):1270-5.  
646 doi: DOI 10.1001/archneur.62.8.1270. PubMed PMID: WOS:000231034300015.
- 647 31. Bonanno L, Lo Buono V, De Salvo S, Ruvolo C, Torre V, Bramanti P, et al. Brain  
648 morphologic abnormalities in migraine patients: an observational study. *J Headache Pain* (2020)  
649 21(1). doi: 10.1186/s10194-020-01109-2. PubMed PMID: WOS:000530354300003.
- 650 32. Demir BT, Bayram NA, Ayturk Z, Erdamar H, Seven P, Calp A, et al. Structural Changes in  
651 the Cerebrum, Cerebellum and Corpus Callosum in Migraine Patients. *Clin Invest Med* (2016)  
652 39(6):S21-S6. PubMed PMID: WOS:000389725000005.
- 653 33. Jin CW, Yuan K, Zhao LM, Zhao L, Yu DH, von Deneen KM, et al. Structural and functional  
654 abnormalities in migraine patients without aura. *Nmr Biomed* (2013) 26(1):58-64. doi:  
655 10.1002/nbm.2819. PubMed PMID: WOS:000313886200007.
- 656 34. Mehnert J, May A. Functional and structural alterations in the migraine cerebellum. *J Cerebr  
657 Blood F Met* (2019) 39(4):730-9. doi: 10.1177/0271678x17722109. PubMed PMID:  
658 WOS:000463032400012.
- 659 35. Yang FC, Chou KH, Lee PL, Yin JH, Chen SY, Kao HW, et al. Patterns of gray matter  
660 alterations in migraine and restless legs syndrome. *Ann Clin Transl Neur* (2019) 6(1):57-67. doi:  
661 10.1002/acn3.680. PubMed PMID: WOS:000455915000006.
- 662 36. Bilgic B, Kocaman G, Arslan AB, Noyan H, Sherifov R, Alkan A, et al. Volumetric  
663 differences suggest involvement of cerebellum and brainstem in chronic migraine. *Cephalalgia*  
664 (2016) 36(4):301-8. doi: 10.1177/0333102415588328. PubMed PMID: WOS:000374014500001.

- 665 37. Coppola G, Petolicchio B, Di Renzo A, Tinelli E, Di Lorenzo C, Parisi V, et al. Cerebral gray  
666 matter volume in patients with chronic migraine: correlations with clinical features. *J Headache Pain*  
667 (2017) 18. doi: ARTN 115
- 668 10.1186/s10194-017-0825-z. PubMed PMID: WOS:000419913100001.
- 669 38. Lai TH, Chou KH, Fuh JL, Lee PL, Kung YC, Lin CP, et al. Gray matter changes related to  
670 medication overuse in patients with chronic migraine. *Cephalalgia* (2016) 36(14):1324-33. doi:  
671 10.1177/0333102416630593. PubMed PMID: WOS:000390004500003.
- 672 39. Elliott MA, Peroutka SJ, Welch S, May EF. Familial hemiplegic migraine, nystagmus, and  
673 cerebellar atrophy. *Ann Neurol* (1996) 39(1):100-6. Epub 1996/01/01. doi: 10.1002/ana.410390115.  
674 PubMed PMID: 8572654.
- 675 40. Haan J, Terwindt GM, Bos PL, Ophoff RA, Frants RR, Ferrari MD. Familial hemiplegic  
676 migraine in The Netherlands. Dutch Migraine Genetics Research Group. *Clin Neurol Neurosurg*  
677 (1994) 96(3):244-9. Epub 1994/08/01. doi: 10.1016/0303-8467(94)90076-0. PubMed PMID:  
678 7988094.
- 679 41. Joutel A, Bousser MG, Biousse V, Labauge P, Chabriat H, Nibbio A, et al. A gene for  
680 familial hemiplegic migraine maps to chromosome 19. *Nat Genet* (1993) 5(1):40-5. Epub  
681 1993/09/01. doi: 10.1038/ng0993-40. PubMed PMID: 8220421.
- 682 42. Kono S, Terada T, Ouchi Y, Miyajima H. An altered GABA-A receptor function in  
683 spinocerebellar ataxia type 6 and familial hemiplegic migraine type 1 associated with the CACNA1A  
684 gene mutation. *BBA Clin* (2014) 2:56-61. Epub 2015/12/18. doi: 10.1016/j.bbacli.2014.09.005.  
685 PubMed PMID: 26675662; PubMed Central PMCID: PMC4633947.
- 686 43. Vighetto A, Froment JC, Trillet M, Aimard G. Magnetic resonance imaging in familial  
687 paroxysmal ataxia. *Arch Neurol* (1988) 45(5):547-9. Epub 1988/05/01. doi:  
688 10.1001/archneur.1988.00520290083018. PubMed PMID: 3358708.
- 689 44. Huang XB, Zhang D, Chen YC, Wang P, Mao CN, Miao ZF, et al. Altered functional  
690 connectivity of the red nucleus and substantia nigra in migraine without aura. *J Headache Pain*  
691 (2019) 20(1). doi: ARTN 104
- 692 10.1186/s10194-019-1058-0. PubMed PMID: WOS:000496421100002.
- 693 45. Ke J, Yu Y, Zhang XD, Su YY, Wang XM, Hu S, et al. Functional Alterations in the  
694 Posterior Insula and Cerebellum in Migraine Without Aura: A Resting-State MRI Study. *Front*  
695 *Behav Neurosci* (2020) 14. doi: ARTN 567588
- 696 10.3389/fnbeh.2020.567588. PubMed PMID: WOS:000579489100001.
- 697 46. Moulton EA, Becerra L, Johnson A, Burstein R, Borsook D. Altered Hypothalamic  
698 Functional Connectivity with Autonomic Circuits and the Locus Coeruleus in Migraine. *Plos One*  
699 (2014) 9(4). doi: ARTN e95508
- 700 10.1371/journal.pone.0095508. PubMed PMID: WOS:000335309100131.
- 701 47. Qin ZX, Su JJ, He XW, Ban SY, Zhu Q, Cui YY, et al. Disrupted functional connectivity  
702 between sub-regions in the sensorimotor areas and cortex in migraine without aura. *J Headache Pain*  
703 (2020) 21(1). doi: ARTN 47



- 704 10.1186/s10194-020-01118-1. PubMed PMID: WOS:000533907700003.
- 705 48. Wei HL, Chen JA, Chen YC, Yu YS, Zhou GP, Qu LJ, et al. Impaired functional connectivity  
706 of limbic system in migraine without aura. *Brain Imaging Behav* (2020) 14(5):1805-14. doi:  
707 10.1007/s11682-019-00116-5. PubMed PMID: WOS:000579512100044.
- 708 49. Zhang D, Huang XB, Su W, Chen YC, Wang P, Mao CN, et al. Altered lateral geniculate  
709 nucleus functional connectivity in migraine without aura: a resting-state functional MRI study. *J*  
710 *Headache Pain* (2020) 21(1). doi: ARTN 17
- 711 10.1186/s10194-020-01086-6. PubMed PMID: WOS:000514509200001.
- 712 50. Ziegeler C, Mehnert J, Asmussen K, May A. Central effects of erenumab in migraine  
713 patients: An event-related functional imaging study. *Neurology* (2020) 95(20):e2794-e802. Epub  
714 2020/09/13. doi: 10.1212/WNL.0000000000010740. PubMed PMID: 32917805.
- 715 51. Karatas M. Migraine and Vertigo. *Headache Research and Treatment* (2011) 2011:793672.  
716 doi: 10.1155/2011/793672.
- 717 52. Anagnostou E, Gerakoulis S, Voskou P, Kararizou E. Postural instability during attacks of  
718 migraine without aura. *Eur J Neurol* (2019) 26(2):319-+. doi: 10.1111/ene.13815. PubMed PMID:  
719 WOS:000455803800019.
- 720 53. Ishizaki K, Mori N, Takeshima T, Fukuhara Y, Ijiri T, Kusumi M, et al. Static stabilometry in  
721 patients with migraine and tension-type headache during a headache-free period. *Psychiatry Clin*  
722 *Neurosci* (2002) 56(1):85-90. Epub 2002/04/04. doi: 10.1046/j.1440-1819.2002.00933.x. PubMed  
723 PMID: 11929575.
- 724 54. Pinheiro CF, Moraes R, Carvalho GF, Sestari L, Will-Lemos T, Bigal ME, et al. The  
725 Influence of Photophobia on Postural Control in Patients With Migraine. *Headache* (2020)  
726 60(8):1644-52. doi: 10.1111/head.13908. PubMed PMID: WOS:000558689000001.
- 727 55. Hayashi H, Sumino R, Sessle BJ. Functional organization of trigeminal subnucleus  
728 interpolaris: nociceptive and innocuous afferent inputs, projections to thalamus, cerebellum, and  
729 spinal cord, and descending modulation from periaqueductal gray. *J Neurophysiol* (1984) 51(5):890-  
730 905. Epub 1984/05/01. doi: 10.1152/jn.1984.51.5.890. PubMed PMID: 6726316.
- 731 56. Ohya A, Tsuruoka M, Imai E, Fukunaga H, Shinya A, Furuya R, et al. Thalamic-Projecting  
732 and Cerebellar-Projecting Interpolaris Neuron Responses to Afferent Inputs. *Brain Res Bull* (1993)  
733 32(6):615-21. doi: Doi 10.1016/0361-9230(93)90163-6. PubMed PMID: WOS:A1993LX83100009.
- 734 57. Ge SN, Li ZH, Tang J, Ma Y, Hioki H, Zhang T, et al. Differential expression of VGLUT1 or  
735 VGLUT2 in the trigeminothalamic or trigeminocerebellar projection neurons in the rat. *Brain Struct*  
736 *Funct* (2014) 219(1):211-29. Epub 2013/02/06. doi: 10.1007/s00429-012-0495-1. PubMed PMID:  
737 23380804.
- 738 58. Baldacara L, Borgio JG, Lacerda AL, Jackowski AP. Cerebellum and psychiatric disorders.  
739 *Braz J Psychiatry* (2008) 30(3):281-9. Epub 2008/10/04. doi: 10.1590/s1516-44462008000300016.  
740 PubMed PMID: 18833430.
- 741 59. Hostetler ED, Joshi AD, Sanabria-Bohorquez S, Fan H, Zeng Z, Purcell M, et al. In vivo  
742 quantification of calcitonin gene-related peptide receptor occupancy by telcagepant in rhesus monkey  
743 and human brain using the positron emission tomography tracer [<sup>11</sup>C]MK-4232. *J Pharmacol Exp*  
744 *Ther* (2013) 347(2):478-86. Epub 2013/08/27. doi: 10.1124/jpet.113.206458. PubMed PMID:  
745 23975906.



- 746 60. Salvatore CA, Moore EL, Calamari A, Cook JJ, Michener MS, O'Malley S, et al.  
747 Pharmacological properties of MK-3207, a potent and orally active calcitonin gene-related peptide  
748 receptor antagonist. *J Pharmacol Exp Ther* (2010) 333(1):152-60. Epub 2010/01/13. doi:  
749 10.1124/jpet.109.163816. PubMed PMID: 20065019.
- 750 61. Edvinsson L, Eftekhari S, Salvatore CA, Warfvinge K. Cerebellar distribution of calcitonin  
751 gene-related peptide (CGRP) and its receptor components calcitonin receptor-like receptor (CLR)  
752 and receptor activity modifying protein 1 (RAMP1) in rat. *Mol Cell Neurosci* (2011) 46(1):333-9.  
753 Epub 2010/11/03. doi: 10.1016/j.mcn.2010.10.005. PubMed PMID: 21040789.
- 754 62. Eftekhari S, Salvatore CA, Connolly BM, O'Malley S, Miller PJ, Zeng Z, et al. CGRP and  
755 CGRP receptors in human and rhesus monkey cerebellum. *J Headache Pain* (2013) 14. doi: Artn P91  
756 10.1186/1129-2377-14-S1-P91. PubMed PMID: WOS:000325525600109.
- 757 63. Morara S, Rosina A, Provini L, Forloni G, Caretti A, Wimalawansa SJ. Calcitonin gene-  
758 related peptide receptor expression in the neurons and glia of developing rat cerebellum: an  
759 autoradiographic and immunohistochemical analysis. *Neuroscience* (2000) 100(2):381-91. Epub  
760 2000/09/29. doi: 10.1016/s0306-4522(00)00276-1. PubMed PMID: 11008176.
- 761 64. Morara S, Wimalawansa SJ, Rosina A. Monoclonal antibodies reveal expression of the CGRP  
762 receptor in Purkinje cells, interneurons and astrocytes of rat cerebellar cortex. *Neuroreport* (1998)  
763 9(16):3755-9. Epub 1998/12/19. doi: 10.1097/00001756-199811160-00034. PubMed PMID:  
764 9858392.
- 765 65. Warfvinge K, Edvinsson L. Distribution of CGRP and CGRP receptor components in the rat  
766 brain. *Cephalalgia* (2019) 39(3):342-53. Epub 2017/09/01. doi: 10.1177/0333102417728873.  
767 PubMed PMID: 28856910.
- 768 66. Eftekhari S, Salvatore CA, Gaspar RC, Roberts R, O'Malley S, Zeng ZZ, et al. Localization of  
769 CGRP Receptor Components, CGRP, and Receptor Binding Sites in Human and Rhesus Cerebellar  
770 Cortex. *Cerebellum* (2013) 12(6):937-49. doi: 10.1007/s12311-013-0509-4. PubMed PMID:  
771 WOS:000325827300020.
- 772 67. Kawai Y, Takami K, Shiosaka S, Emson PC, Hillyard CJ, Girgis S, et al. Topographic  
773 localization of calcitonin gene-related peptide in the rat brain: an immunohistochemical analysis.  
774 *Neuroscience* (1985) 15(3):747-63. Epub 1985/07/01. doi: 10.1016/0306-4522(85)90076-4. PubMed  
775 PMID: 3877882.
- 776 68. Zhang XY, Wang JJ, Zhu JN. Cerebellar fastigial nucleus: from anatomic construction to  
777 physiological functions. *Cerebellum Ataxias* (2016) 3:9. Epub 2016/05/05. doi: 10.1186/s40673-016-  
778 0047-1. PubMed PMID: 27144010; PubMed Central PMCID: PMC4853849.
- 779 69. Fujita H, Kodama T, du Lac S. Modular output circuits of the fastigial nucleus for diverse  
780 motor and nonmotor functions of the cerebellar vermis. *Elife* (2020) 9. Epub 2020/07/09. doi:  
781 10.7554/eLife.58613. PubMed PMID: 32639229; PubMed Central PMCID: PMC7438114.
- 782 70. Saab CY, Willis WD. Cerebellar stimulation modulates the intensity of a visceral nociceptive  
783 reflex in the rat. *Exp Brain Res* (2002) 146(1):117-21. Epub 2002/08/23. doi: 10.1007/s00221-002-  
784 1107-8. PubMed PMID: 12192585.
- 785 71. Zhen LL, Miao B, Chen YY, Su Z, Xu MQ, Fei SJ, et al. Protective effect and mechanism of  
786 injection of glutamate into cerebellum fastigial nucleus on chronic visceral hypersensitivity in rats.

- 787 *Life Sci* (2018) 203:184-92. doi: 10.1016/j.lfs.2018.04.043. PubMed PMID:  
788 WOS:000432846600022.
- 789 72. Saab CY, Garcia-Nicas E, Willis WD. Stimulation in the rat fastigial nucleus enhances the  
790 responses of neurons in the dorsal column nuclei to innocuous stimuli. *Neurosci Lett* (2002)  
791 327(1):17-20. Epub 2002/07/06. doi: 10.1016/s0304-3940(02)00379-8. PubMed PMID: 12098490.
- 792 73. Wattiez AS, Gaul OJ, Kuburas A, Zorilla E, Waite JS, Mason BN, et al. CGRP induces  
793 migraine-like symptoms in mice during both the active and inactive phases. *J Headache Pain* (2021)  
794 22(1). doi: ARTN 62  
795 10.1186/s10194-021-01277-9. PubMed PMID: WOS:000668540300001.
- 796 74. Mason BN, Wattiez AS, Balczak LK, Kuburas A, Kutschke WJ, Russo AF. Vascular actions  
797 of peripheral CGRP in migraine-like photophobia in mice. *Cephalalgia* (2020) 40(14):1585-604.  
798 Epub 2020/08/20. doi: 10.1177/0333102420949173. PubMed PMID: 32811179; PubMed Central  
799 PMCID: PMCPMC7785273.
- 800 75. Kuburas A, Mason BN, Hing B, Wattiez AS, Reis AS, Sowers LP, et al. PACAP Induces  
801 Light Aversion in Mice by an Inheritable Mechanism Independent of CGRP. *J Neurosci* (2021)  
802 41(21):4697-715. Epub 2021/04/14. doi: 10.1523/JNEUROSCI.2200-20.2021. PubMed PMID:  
803 33846231; PubMed Central PMCID: PMCPMC8260237.
- 804 76. Wang M, Mason BN, Sowers LP, Kuburas A, Rea BJ, Russo AF. Investigating Migraine-  
805 Like Behavior using Light Aversion in Mice. *JoVE* (2021) (174):e62839. doi: doi:10.3791/62839.
- 806 77. Raithel SJ, Sapio MR, Iadarola MJ, Mannes AJ. Thermal A- Nociceptors, Identified by  
807 Transcriptomics, Express Higher Levels of Anesthesia-Sensitive Receptors Than Thermal C-Fibers  
808 and Are More Suppressible by Low-Dose Isoflurane. *Anesth Analg* (2018) 127(1):263-6. doi:  
809 10.1213/Ane.0000000000002505. PubMed PMID: WOS:000435465900040.
- 810 78. Wattiez AS, Castonguay WC, Gaul OJ, Waite JS, Schmidt CM, Reis AS, et al. Different  
811 forms of traumatic brain injuries cause different tactile hypersensitivity profiles. *Pain* (2021)  
812 162(4):1163-75. Epub 2020/10/08. doi: 10.1097/j.pain.0000000000002103. PubMed PMID:  
813 33027220; PubMed Central PMCID: PMCPMC8008742.
- 814 79. Chaplan SR, Bach FW, Pogrel JW, Chung JM, Yaksh TL. Quantitative assessment of tactile  
815 allodynia in the rat paw. *J Neurosci Methods* (1994) 53(1):55-63. Epub 1994/07/01. doi:  
816 10.1016/0165-0270(94)90144-9. PubMed PMID: 7990513.
- 817 80. Dixon WJ. The up-and-down Method for Small Samples. *J Am Stat Assoc* (1965)  
818 60(312):967-78. doi: Doi 10.2307/2283398. PubMed PMID: WOS:A1965CKX1600002.
- 819 81. Rea BJ, Davison A, Ketcha M-J, Smith KJ, Fairbanks AM, Wattiez A-S, et al. Automated  
820 detection of squint as a sensitive assay of sex-dependent CGRP and amylin-induced pain in mice.  
821 *PAIN* (2021). doi: 10.1097/j.pain.0000000000002537. PubMed PMID: 00006396-900000000-97845.
- 822 82. Lipton RB, Bigal ME, Ashina S, Burstein R, Silberstein S, Reed ML, et al. Cutaneous  
823 allodynia in the migraine population. *Ann Neurol* (2008) 63(2):148-58. Epub 2007/12/07. doi:  
824 10.1002/ana.21211. PubMed PMID: 18059010; PubMed Central PMCID: PMCPMC2729495.
- 825 83. Bigal ME, Ashina S, Burstein R, Reed ML, Buse D, Serrano D, et al. Prevalence and  
826 characteristics of allodynia in headache sufferers: a population study. *Neurology* (2008) 70(17):1525-  
827 33. Epub 2008/04/23. doi: 10.1212/01.wnl.0000310645.31020.b1. PubMed PMID: 18427069.

- 828 84. Langford DJ, Bailey AL, Chanda ML, Clarke SE, Drummond TE, Echols S, et al. Coding of  
829 facial expressions of pain in the laboratory mouse. *Nat Methods* (2010) 7(6):447-9. Epub 2010/05/11.  
830 doi: 10.1038/nmeth.1455. PubMed PMID: 20453868.
- 831 85. Rea BJ, Wattiez AS, Waite JS, Castonguay WC, Schmidt CM, Fairbanks AM, et al.  
832 Peripherally administered calcitonin gene-related peptide induces spontaneous pain in mice:  
833 implications for migraine. *Pain* (2018) 159(11):2306-17. Epub 2018/07/12. doi:  
834 10.1097/j.pain.0000000000001337. PubMed PMID: 29994995; PubMed Central PMCID:  
835 PMC6193822.
- 836 86. Simms J, Uddin R, Sakmar TP, Gingell JJ, Garelja ML, Hay DL, et al. Photoaffinity Cross-  
837 Linking and Unnatural Amino Acid Mutagenesis Reveal Insights into Calcitonin Gene-Related  
838 Peptide Binding to the Calcitonin Receptor-like Receptor/Receptor Activity-Modifying Protein 1  
839 (CLR/RAMP1) Complex. *Biochemistry-US* (2018) 57(32):4915-22. doi:  
840 10.1021/acs.biochem.8b00502. PubMed PMID: WOS:000442184600015.
- 841 87. Abad N, Rosenberg JT, Hike DC, Harrington MG, Grant SC. Dynamic sodium imaging at  
842 ultra-high field reveals progression in a preclinical migraine model. *Pain* (2018) 159(10):2058-65.  
843 doi: 10.1097/j.pain.0000000000001307. PubMed PMID: WOS:000451227100017.
- 844 88. Jia Z, Yu S, Tang W, Zhao D. Altered functional connectivity of the insula in a rat model of  
845 recurrent headache. *Mol Pain* (2020) 16:1744806920922115. Epub 2020/04/28. doi:  
846 10.1177/1744806920922115. PubMed PMID: 32338132; PubMed Central PMCID:  
847 PMC67227144.
- 848 89. Jia ZH, Chen XY, Tang WJ, Zhao DF, Yu SY. Atypical functional connectivity between the  
849 anterior cingulate cortex and other brain regions in a rat model of recurrent headache. *Mol Pain*  
850 (2019) 15. doi: Artn 1744806919842483  
851 10.1177/1744806919842483. PubMed PMID: WOS:000465904000001.
- 852 90. Li P, Gu H, Xu J, Zhang Z, Li F, Feng M, et al. Purkinje cells of vestibulocerebellum play an  
853 important role in acute vestibular migraine. *J Integr Neurosci* (2019) 18(4):409-14. Epub 2020/01/09.  
854 doi: 10.31083/j.jin.2019.04.1168. PubMed PMID: 31912699.
- 855 91. Pietrobon D. Function and dysfunction of synaptic calcium channels: insights from mouse  
856 models. *Curr Opin Neurobiol* (2005) 15(3):257-65. Epub 2005/06/01. doi:  
857 10.1016/j.conb.2005.05.010. PubMed PMID: 15922581.
- 858 92. Adams PJ, Rungta RL, Garcia E, van den Maagdenberg AM, MacVicar BA, Snutch TP.  
859 Contribution of calcium-dependent facilitation to synaptic plasticity revealed by migraine mutations  
860 in the P/Q-type calcium channel. *Proc Natl Acad Sci U S A* (2010) 107(43):18694-9. Epub  
861 2010/10/13. doi: 10.1073/pnas.1009500107. PubMed PMID: 20937883; PubMed Central PMCID:  
862 PMC2972937.
- 863 93. Dey PK, Ray AK. Anterior cerebellum as a site for morphine analgesia and post-stimulation  
864 analgesia. *Indian journal of physiology and pharmacology* (1982) 26(1):3-12. Epub 1982/01/01.  
865 PubMed PMID: 7106957.
- 866 94. Siegel P, Wepsic JG. Alteration of nociception by stimulation of cerebellar structures in the  
867 monkey. *Physiol Behav* (1974) 13(2):189-94. Epub 1974/08/01. doi: 10.1016/0031-9384(74)90033-  
868 x. PubMed PMID: 4212925.

- 869 95. Sacchetti B, Scelfo B, Strata P. The cerebellum: synaptic changes and fear conditioning.  
870 *Neuroscientist* (2005) 11(3):217-27. Epub 2005/05/25. doi: 10.1177/1073858405276428. PubMed  
871 PMID: 15911871.
- 872 96. Dong WQ, Wilson OB, Skolnick MH, Dafny N. Hypothalamic, dorsal raphe and external  
873 electrical stimulation modulate noxious evoked responses of habenula neurons. *Neuroscience* (1992)  
874 48(4):933-40. Epub 1992/06/01. doi: 10.1016/0306-4522(92)90281-6. PubMed PMID: 1630629.
- 875 97. Liu FY, Qiao JT, Dafny N. Cerebellar stimulation modulates thalamic noxious-evoked  
876 responses. *Brain Res Bull* (1993) 30(5-6):529-34. Epub 1993/01/01. doi: 10.1016/0361-  
877 9230(93)90079-q. PubMed PMID: 8457903.
- 878 98. Saab CY, Kawasaki M, Al-Chaer ED, Willis WD. Cerebellar cortical stimulation increases  
879 spinal visceral nociceptive responses. *J Neurophysiol* (2001) 85(6):2359-63. Epub 2001/06/02. doi:  
880 10.1152/jn.2001.85.6.2359. PubMed PMID: 11387382.
- 881 99. Hagains CE, Senapati AK, Huntington PJ, He JW, Peng YB. Inhibition of spinal cord dorsal  
882 horn neuronal activity by electrical stimulation of the cerebellar cortex. *J Neurophysiol* (2011)  
883 106(5):2515-22. Epub 2011/08/13. doi: 10.1152/jn.00719.2010. PubMed PMID: 21832034.
- 884 100. Digre KB, Brennan KC. Shedding light on photophobia. *J Neuroophthalmol* (2012) 32(1):68-  
885 81. Epub 2012/02/15. doi: 10.1097/WNO.0b013e3182474548. PubMed PMID: 22330853; PubMed  
886 Central PMCID: PMCPMC3485070.
- 887 101. Russo AF. Calcitonin Gene-Related Peptide (CGRP): A New Target for Migraine. *Annu Rev*  
888 *Pharmacol* (2015) 55:533-52. doi: 10.1146/annurev-pharmtox-010814-124701. PubMed PMID:  
889 WOS:000348560500028.
- 890 102. Russo AF, Recker A. Unanswered Questions in Headache: So What Is Photophobia,  
891 Anyway? *Headache* (2013) 53(10):1677-8. doi: 10.1111/head.12231. PubMed PMID:  
892 WOS:000327253600019.
- 893 103. Seidel S, Beisteiner R, Manecke M, Aslan TS, Wober C. Psychiatric comorbidities and  
894 photophobia in patients with migraine. *J Headache Pain* (2017) 18(1):18. Epub 2017/02/12. doi:  
895 10.1186/s10194-017-0718-1. PubMed PMID: 28185159; PubMed Central PMCID:  
896 PMCPMC5307401.
- 897 104. Nosedá R, Copenhagen D, Burstein R. Current understanding of photophobia, visual  
898 networks and headaches. *Cephalalgia* (2019) 39(13):1623-34. Epub 2018/06/27. doi:  
899 10.1177/0333102418784750. PubMed PMID: 29940781; PubMed Central PMCID:  
900 PMCPMC6461529.
- 901 105. Martersteck EM, Hirokawa KE, Evarts M, Bernard A, Duan X, Li Y, et al. Diverse Central  
902 Projection Patterns of Retinal Ganglion Cells. *Cell Rep* (2017) 18(8):2058-72. Epub 2017/02/24. doi:  
903 10.1016/j.celrep.2017.01.075. PubMed PMID: 28228269; PubMed Central PMCID:  
904 PMCPMC5357325.
- 905 106. Zwimpfer TJ, Aguayo AJ, Bray GM. Synapse formation and preferential distribution in the  
906 granule cell layer by regenerating retinal ganglion cell axons guided to the cerebellum of adult  
907 hamsters. *J Neurosci* (1992) 12(4):1144-59. Epub 1992/04/01. PubMed PMID: 1556590; PubMed  
908 Central PMCID: PMCPMC6575799.
- 909 107. McLean CP, Asnaani A, Litz BT, Hofmann SG. Gender differences in anxiety disorders:  
910 prevalence, course of illness, comorbidity and burden of illness. *J Psychiatr Res* (2011) 45(8):1027-



- 911 35. Epub 2011/03/29. doi: 10.1016/j.jpsychires.2011.03.006. PubMed PMID: 21439576; PubMed  
912 Central PMCID: PMCPMC3135672.
- 913 108. Babaev O, Piletti Chatain C, Krueger-Burg D. Inhibition in the amygdala anxiety circuitry.  
914 *Exp Mol Med* (2018) 50(4):1-16. Epub 2018/04/10. doi: 10.1038/s12276-018-0063-8. PubMed  
915 PMID: 29628509; PubMed Central PMCID: PMCPMC5938054.
- 916 109. Teune TM, van der Burg J, van der Moer J, Voogd J, Ruigrok TJH. Topography of cerebellar  
917 nuclear projections to the brain stem in the rat. *Cerebellar Modules: Molecules, Morphology, and*  
918 *Function* (2000) 124:141-72. PubMed PMID: WOS:000180918700011.
- 919 110. Graeff FG. Serotonin, the periaqueductal gray and panic. *Neurosci Biobehav Rev* (2004)  
920 28(3):239-59. Epub 2004/07/01. doi: 10.1016/j.neubiorev.2003.12.004. PubMed PMID: 15225969.
- 921 111. Maleki N, Linnman C, Brawn J, Burstein R, Becerra L, Borsook D. Her versus his migraine:  
922 multiple sex differences in brain function and structure. *Brain* (2012) 135(Pt 8):2546-59. Epub  
923 2012/07/31. doi: 10.1093/brain/aws175. PubMed PMID: 22843414.
- 924 112. Benatto MT, Florencio LL, Carvalho GF, Dach F, Bigal ME, Chaves TC, et al. Cutaneous  
925 allodynia is more frequent in chronic migraine, and its presence and severity seems to be more  
926 associated with the duration of the disease. *Arq Neuro-Psiquiat* (2017) 75(3):153-9. doi:  
927 10.1590/0004-282x20170015. PubMed PMID: WOS:000397873200005.
- 928 113. Louter MA, Bosker JE, van Oosterhout WPJ, van Zwet EW, Zitman FG, Ferrari MD, et al.  
929 Cutaneous allodynia as a predictor of migraine chronification. *Brain* (2013) 136:3489-96. doi:  
930 10.1093/brain/awt251. PubMed PMID: WOS:000326291800029.
- 931 114. Burstein R, Yarnitsky D, Goor-Aryeh I, Ransil BJ, Bajwa ZH. An association between  
932 migraine and cutaneous allodynia. *Annals of Neurology* (2000) 47(5):614-24. doi: Doi 10.1002/1531-  
933 8249(200005)47:5<614::Aid-Ana9>3.3.Co;2-E. PubMed PMID: WOS:000086731000009.
- 934 115. Avona A, Burgos-Vega C, Burton MD, Akopian AN, Price TJ, Dussor G. Dural Calcitonin  
935 Gene-Related Peptide Produces Female-Specific Responses in Rodent Migraine Models. *J Neurosci*  
936 (2019) 39(22):4323-31. Epub 2019/04/10. doi: 10.1523/JNEUROSCI.0364-19.2019. PubMed PMID:  
937 30962278; PubMed Central PMCID: PMCPMC6538861.
- 938 116. Kao CH, Wang SJ, Tsai CF, Chen SP, Wang YF, Fuh JL. Psychiatric comorbidities in  
939 allodynic migraineurs. *Cephalalgia* (2014) 34(3):211-8. Epub 2013/09/21. doi:  
940 10.1177/0333102413505238. PubMed PMID: 24048892.
- 941 117. Han SM, Kim KM, Cho SJ, Yang KI, Kim D, Yun CH, et al. Prevalence and characteristics  
942 of cutaneous allodynia in probable migraine. *Sci Rep* (2021) 11(1):2467. Epub 2021/01/30. doi:  
943 10.1038/s41598-021-82080-z. PubMed PMID: 33510340; PubMed Central PMCID:  
944 PMCPMC7844001.
- 945 118. Wang M, Wattiez A-S, Russo AF. CGRP Antibodies for Animal Models of Primary and  
946 Secondary Headache Disorders. In: Maassen van den Brink A, Martelletti P, editors. *Monoclonal*  
947 *Antibodies in Headache : From Bench to Patient*. Cham: Springer International Publishing (2021). p.  
948 69-97.
- 949 119. Ruscheweyh R, Kuhnel M, Filippopoulos F, Blum B, Eggert T, Straube A. Altered  
950 experimental pain perception after cerebellar infarction. *Pain* (2014) 155(7):1303-12. doi:  
951 10.1016/j.pain.2014.04.006. PubMed PMID: WOS:000339136100020.



952 120. van den Pol AN. Neuropeptide transmission in brain circuits. *Neuron* (2012) 76(1):98-115.  
953 Epub 2012/10/09. doi: 10.1016/j.neuron.2012.09.014. PubMed PMID: 23040809; PubMed Central  
954 PMCID: PMC3918222.

955 121. Hay DL, Walker CS. CGRP and its receptors. *Headache* (2017) 57(4):625-36. Epub  
956 2017/02/25. doi: 10.1111/head.13064. PubMed PMID: 28233915.

957

## 958 10 Figure Legends

959 **Fig. 1 Injection of CGRP into the MN induced light-aversive behavior under dim light in both**  
960 **male and female mice.** (A) Time in light every 5-min block during 30-min light/dark assay at 55 lux  
961 following injection of PBS (n=11; F: n=5; M: n=6) or CGRP (1  $\mu$ g/200 nl; n=10; F: n=5; M: n=5)  
962 into the right MN of C57BL/6J mice via cannulas. Time in light for all mice (left), female mice  
963 (middle), and male mice (right). Data are from two independent experiments. All mice in A are  
964 further analyzed in B. (B) Mean time in light per 5-min block for individual mice. (C) Schematic of  
965 positions of injection cannula tips superimposed on Allen Mouse Brain Atlas coronal images.  
966 Numbers indicate the distance from bregma in the anteroposterior plane. Data are the mean  $\pm$  SEM.  
967 Statistics are described in Supplementary Table 1.

968 **Fig. 2 Injection of CGRP into the MN reduced motility in both males and females.** Motility data  
969 were collected at the same time as light aversion data from the same mice shown in Fig. 1. Mice were  
970 given PBS (n=11; F: n=5; M: n=6) or CGRP (1  $\mu$ g/200 nl; n=10; F: n=5; M: n=5) into the right MN  
971 of C57BL/6J mice via cannulas. Data are from two independent experiments. (A) Percentage of time  
972 spent resting in the light (upper panel) and dark (lower panel) zones every 5-min block during 30-min  
973 light/dark assay for all mice (left), female mice (middle), and male mice (right). All mice in A are  
974 further analyzed in B. (B) Mean percentage of time in light (upper panel) and dark (lower panel)  
975 zones per 5-min block for individual mice from A. (C) Number of vertical beam breaks per min in  
976 light (upper panel) and dark (lower panel) zones every 5-min block during 30-min light/dark assay  
977 for all mice (left), female mice (middle), and male mice (right). All mice in C are further analyzed in  
978 D. (D) Mean number of vertical beam breaks in light (upper panel) and dark (lower panel) zones per  
979 5-min block for individual mice from C. (E) Number of transitions between light and dark zones  
980 every 5-min block during 30-min light/dark assay for all mice (left), female mice (middle), and male  
981 mice (right). All mice in E are further analyzed in F. (F) Mean number of transitions between light  
982 and dark zones per 5-min block for individual mice from E. Data are the mean  $\pm$  SEM. Statistics are  
983 described in Supplementary Table 1.

984 **Fig. 3 Injection of CGRP into the MN induced anxiety-like behavior primarily in females in the**  
985 **open field assay.** (A) Percentage of time spent in the center of the open field every 5-min block  
986 during 30-min testing period following injection of PBS (n=11; F: n=5; M: n=6) or CGRP (1  $\mu$ g/200  
987 nl; n=11; F: n=5; M: n=6) into the right MN of C57BL/6J mice via cannulas. All mice (left)  
988 separated by sex (female: middle; male: right). Data are from two independent experiments. All mice  
989 in A are further analyzed in B. (B) Mean percentage of time in the center per 5-min block for  
990 individual mice. Data are the mean  $\pm$  SEM. Statistics are described in Supplementary Table 1.

991 **Fig. 4 Injection of CGRP into the MN induced plantar tactile hypersensitivity in the**  
992 **contralateral hind paw primarily in female mice.** Plantar tactile sensitivity was assessed with  
993 injection of PBS or CGRP (1  $\mu$ g/200 nl) into the right MN of C57BL/6J mice via cannulas. Data are

994 from three independent experiments. **(A)** The individual thresholds of left hind paws for all mice  
995 (left) (PBS: n=17; CGRP: n=26), female mice (middle) (PBS: n=8; CGRP: n=14), and male mice  
996 (right) (PBS: n=9; CGRP: n=12). **(B)** The individual thresholds of right hind paws for all mice (left)  
997 (PBS: n=17; CGRP: n=26), female mice (middle) (PBS: n=8; CGRP: n=14), and male mice (right)  
998 (PBS: n=9; CGRP: n=12). The mean  $\pm$  SEM 50% thresholds are presented. Statistics are described in  
999 Supplementary Table 1.

1000 **Fig. 5 Injection of CGRP into the MN induced squinting behavior primarily in female mice. (A)**  
1001 Mean pixel area over 5-min testing period for all mice without treatment (as baseline), with injection  
1002 of PBS (left) or CGRP (middle; 1  $\mu$ g/200 nl) into the right MN of C57BL/6J mice via cannulas. Right  
1003 panel is the mean pixel area over 5-min testing period for individual mice (PBS: n=30; CGRP: n=  
1004 27). Data from A separated as female (B) and male (C). Data are from two independent experiments  
1005 and one crossover treatment experiment. **(B)** Mean pixel area over 5-min testing period for female  
1006 mice (left and middle) and mean pixel area over 5-min testing period for individual female mice  
1007 (right; PBS: n=17; CGRP: n= 14). **(C)** Mean pixel area over 5-min testing period for male mice (left  
1008 and middle) and mean pixel area over 5-min testing period for individual male mice (right; PBS:  
1009 n=13; CGRP: n=13). Data are the mean  $\pm$  SEM. Statistics are described in Supplementary Table 1.

**A**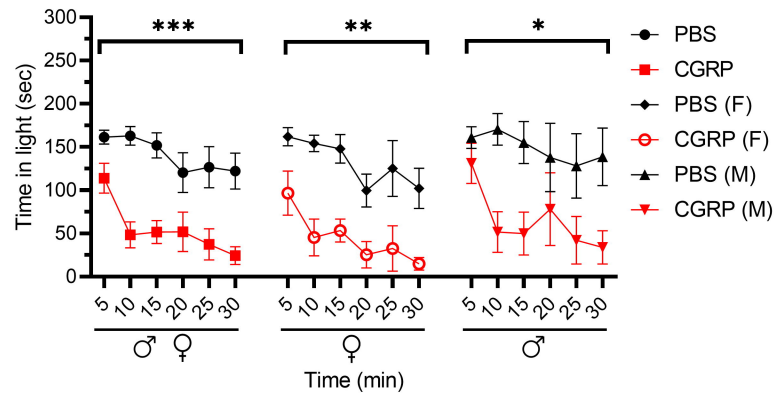**B**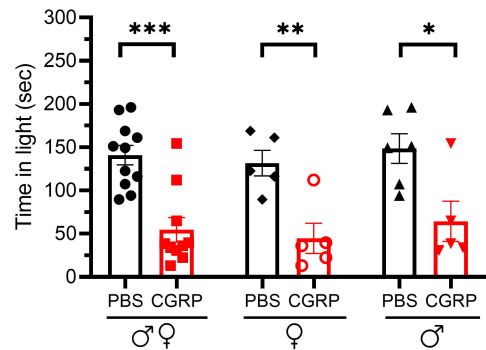**C**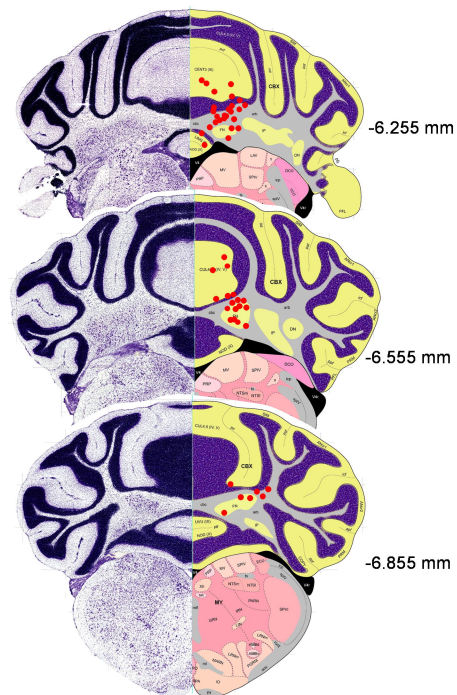

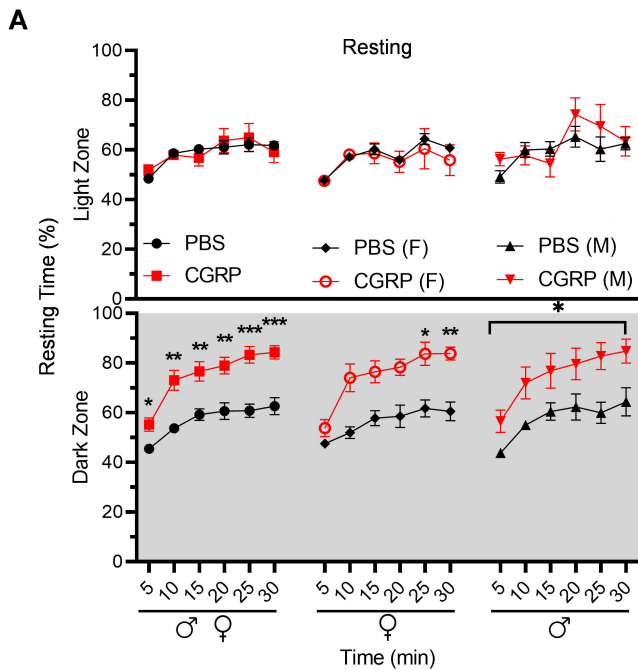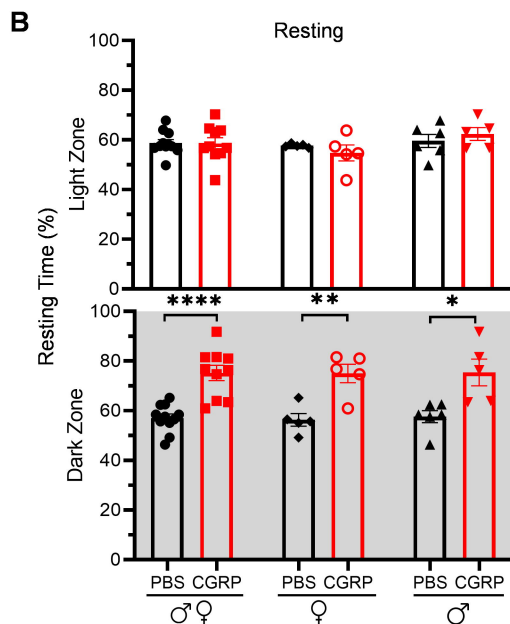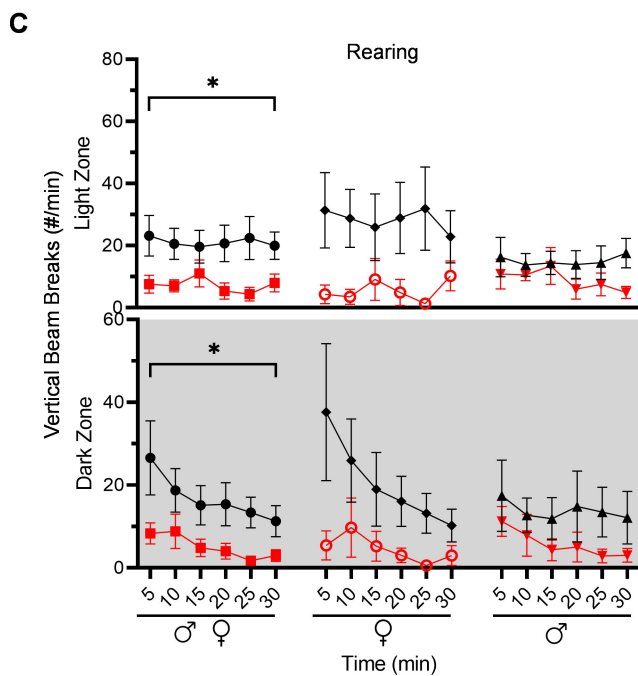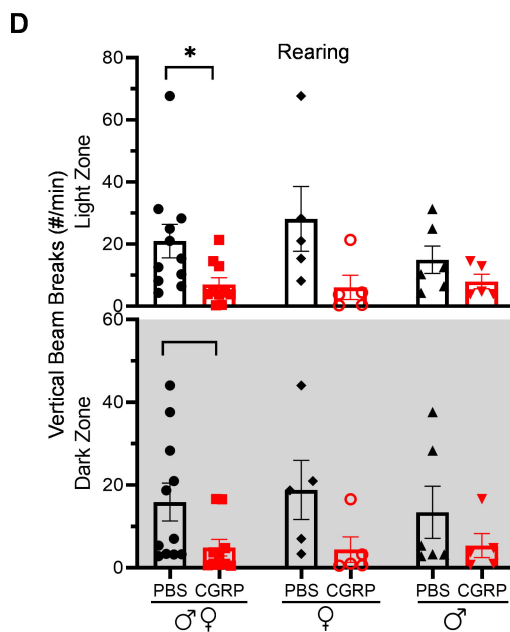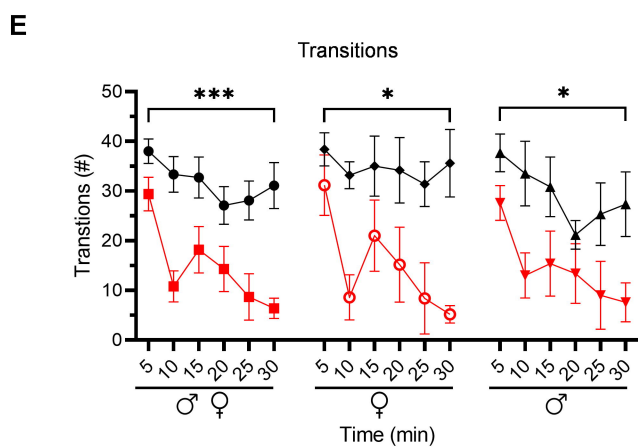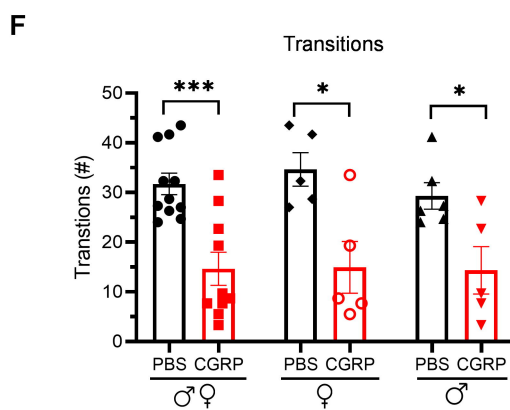



**A**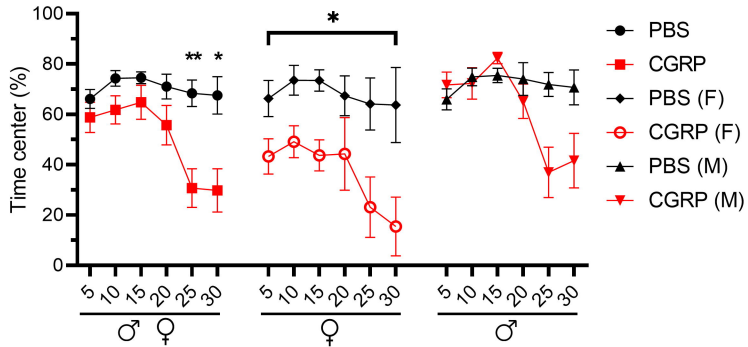**B**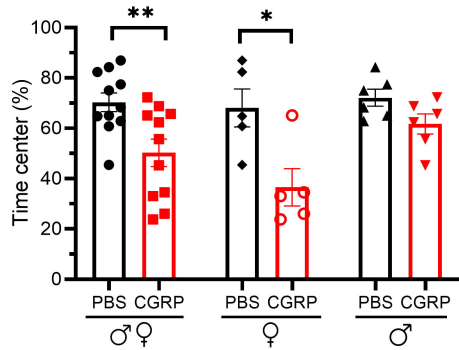

**A**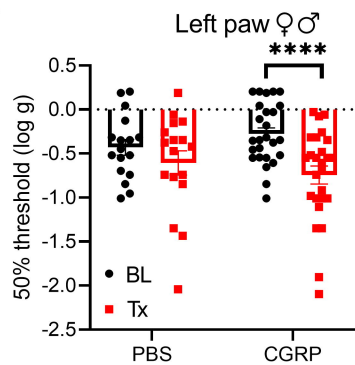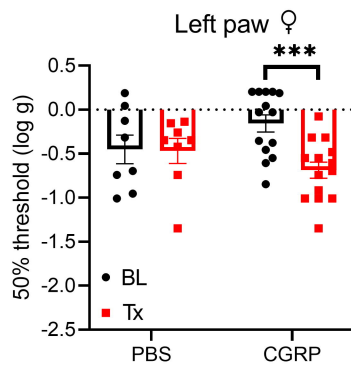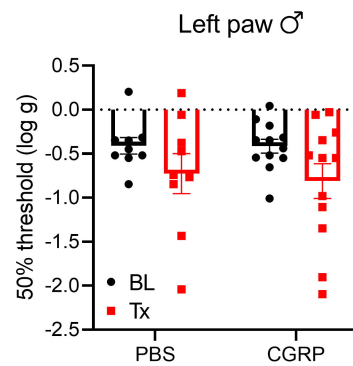**B**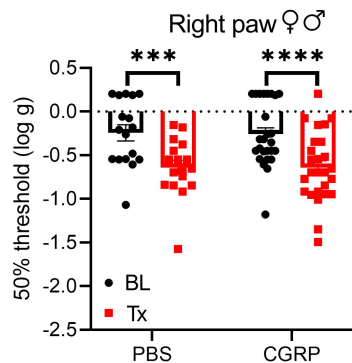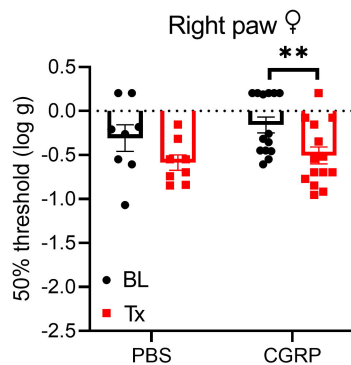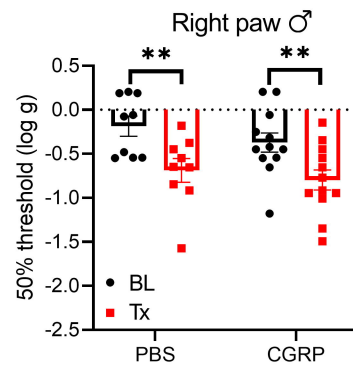

**A ♀♂**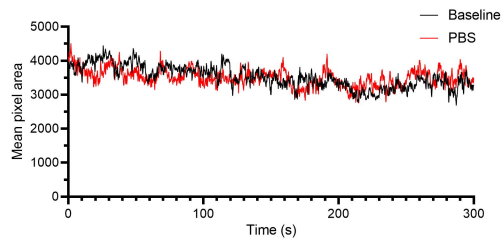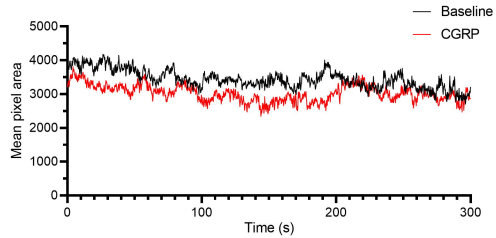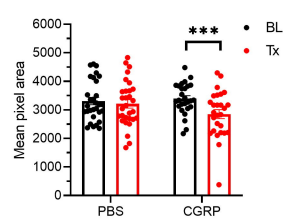**B ♀**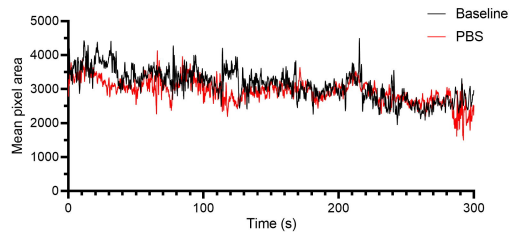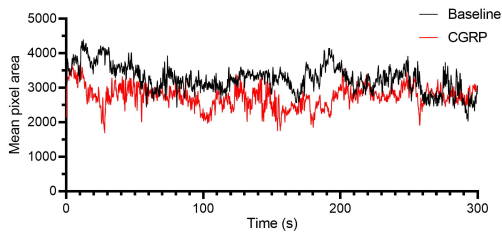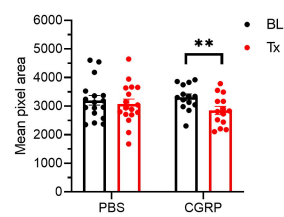**C ♂**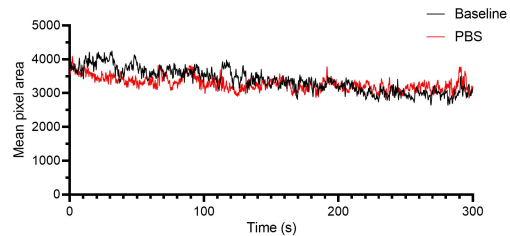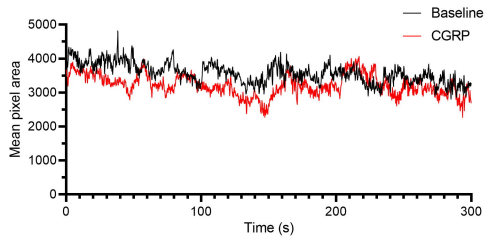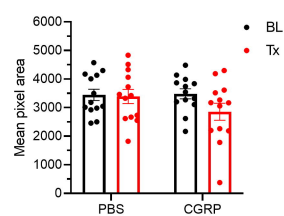

Source: http://biorxiv.org/content/10.1101/2022.01.24.477577v1.full.pdf
